# Supplementary material for: Selective serotonin reuptake inhibitors versus placebo in patients with major depressive disorder. A systematic review with meta-analysis and Trial Sequential Analysis
Source: PubMed Central journal article supplement (PMC5299662; doi:10.1186/s12888-016-1173-2), 2017-02-08

| Study or Subgroup                                                                                           | Experimental |              | Control |             | Weight        | Risk Ratio          |                     |
|-------------------------------------------------------------------------------------------------------------|--------------|--------------|---------|-------------|---------------|---------------------|---------------------|
|                                                                                                             | Events       | Total        | Events  | Total       |               | M-H, Random, 95% CI | Risk Ratio          |
| 29060/448 (A)                                                                                               | 19           | 108          | 4       | 55          | 0.7%          | 2.42                | [0.87, 6.76]        |
| 29060/448 (B)                                                                                               | 33           | 112          | 4       | 55          | 0.7%          | 4.05                | [1.51, 10.86]       |
| 29060/448 (A)                                                                                               | 27           | 106          | 6       | 51          | 1.0%          | 2.17                | [0.95, 4.91]        |
| 29060/448 (B)                                                                                               | 30           | 106          | 6       | 52          | 1.0%          | 2.45                | [1.09, 5.52]        |
| 29060/785 (A)                                                                                               | 14           | 103          | 2       | 27          | 0.4%          | 1.83                | [0.44, 7.59]        |
| 29060/785 (B)                                                                                               | 16           | 96           | 2       | 26          | 0.4%          | 2.17                | [0.53, 8.83]        |
| 29060/785 (C)                                                                                               | 19           | 107          | 2       | 26          | 0.4%          | 2.31                | [0.87, 6.29]        |
| 29060/785 (D)                                                                                               | 16           | 100          | 2       | 26          | 0.4%          | 2.08                | [0.81, 4.89]        |
| Andreoli et al. 2002                                                                                        | 33           | 127          | 13      | 128         | 1.6%          | 2.56                | [1.41, 4.63]        |
| Bali et al (2014)                                                                                           | 19           | 79           | 7       | 79          | 1.0%          | 2.71                | [1.21, 6.09]        |
| Bose 2008                                                                                                   | 19           | 130          | 8       | 134         | 1.1%          | 2.45                | [1.11, 5.39]        |
| Burke et al. (A) 2002                                                                                       | 21           | 119          | 6       | 122         | 0.9%          | 3.59                | [1.50, 8.58]        |
| Burke et al. (B) 2002                                                                                       | 14           | 125          | 6       | 122         | 0.8%          | 2.28                | [0.90, 5.73]        |
| Burke et al. (C) 2002                                                                                       | 22           | 125          | 6       | 122         | 0.9%          | 3.58                | [1.50, 8.52]        |
| Cassano et al. 1996                                                                                         | 29           | 161          | 6       | 149         | 1.0%          | 4.47                | [1.91, 10.47]       |
| Claghorn 1992a                                                                                              | 13           | 36           | 2       | 35          | 0.4%          | 6.32                | [1.54, 25.99]       |
| Claghorn et al. 1996                                                                                        | 11           | 47           | 4       | 46          | 0.7%          | 2.69                | [0.92, 7.84]        |
| Cohn et al. 1985                                                                                            | 15           | 54           | 3       | 58          | 0.5%          | 5.37                | [1.65, 17.53]       |
| Cohn et al. 1991                                                                                            | 13           | 40           | 7       | 40          | 1.0%          | 1.86                | [0.83, 4.16]        |
| Coleman et al. 1999                                                                                         | 26           | 115          | 14      | 121         | 1.6%          | 1.95                | [1.08, 3.55]        |
| Coleman et al. 2001                                                                                         | 18           | 154          | 24      | 152         | 1.7%          | 0.74                | [0.42, 1.31]        |
| Corrigan et al. 2000                                                                                        | 6            | 33           | 7       | 34          | 0.6%          | 0.88                | [0.33, 2.35]        |
| Croft et al. 1999                                                                                           | 37           | 118          | 12      | 119         | 1.6%          | 3.11                | [1.71, 5.66]        |
| Davidson et al. 2002                                                                                        | 41           | 111          | 24      | 116         | 2.3%          | 1.79                | [1.16, 2.75]        |
| Dominguez et al. 1985                                                                                       | 14           | 35           | 1       | 31          | 0.2%          | 12.40               | [1.73, 88.95]       |
| Dubé et al. 2009                                                                                            | 7            | 62           | 5       | 138         | 0.6%          | 3.12                | [1.03, 9.43]        |
| Dunbar et al. 1991                                                                                          | 67           | 240          | 29      | 240         | 2.5%          | 2.31                | [1.55, 3.44]        |
| Dunlop et al (A)                                                                                            | 15           | 105          | 3       | 20          | 0.6%          | 0.95                | [0.30, 2.99]        |
| Dunlop et al (B)                                                                                            | 33           | 104          | 3       | 19          | 0.6%          | 2.01                | [0.69, 5.89]        |
| Dunlop et al (C)                                                                                            | 32           | 107          | 3       | 19          | 0.6%          | 1.89                | [0.64, 5.67]        |
| Fabre 1992                                                                                                  | 13           | 39           | 2       | 38          | 0.4%          | 6.33                | [1.53, 26.20]       |
| Fabre et al. 1987                                                                                           | 17           | 72           | 0       | 12          | 0.1%          | 6.23                | [0.40, 97.35]       |
| Fabre et al. 1985                                                                                           | 94           | 278          | 14      | 91          | 1.9%          | 2.20                | [1.32, 3.69]        |
| Fabre et al. 1996                                                                                           | 14           | 46           | 8       | 44          | 1.1%          | 1.67                | [0.78, 3.59]        |
| Fava et al. 2005                                                                                            | 4            | 47           | 7       | 43          | 0.6%          | 0.52                | [0.16, 1.66]        |
| Feighner et al. 1989a                                                                                       | 16           | 51           | 8       | 48          | 1.1%          | 1.88                | [0.89, 3.99]        |
| Feighner et al. 1989b                                                                                       | 11           | 31           | 3       | 19          | 0.6%          | 2.25                | [0.72, 7.04]        |
| Feighner et al. 1999                                                                                        | 120          | 521          | 14      | 129         | 1.9%          | 2.12                | [1.26, 3.57]        |
| Goldstein et al (2002)                                                                                      | 6            | 33           | 9       | 70          | 0.6%          | 1.41                | [0.55, 3.64]        |
| Goldstein et al. 2004                                                                                       | 14           | 87           | 2       | 89          | 0.4%          | 7.16                | [1.68, 30.59]       |
| Griebel et al. 2012 a                                                                                       | 8            | 84           | 4       | 75          | 0.6%          | 1.79                | [0.56, 5.69]        |
| Griebel et al. 2012 b                                                                                       | 19           | 80           | 5       | 77          | 0.8%          | 3.66                | [1.44, 9.31]        |
| Higuchi et al. (A) 2011                                                                                     | 27           | 161          | 7       | 86          | 1.1%          | 2.06                | [0.94, 4.54]        |
| Higuchi et al. (B) 2011                                                                                     | 14           | 83           | 7       | 86          | 0.9%          | 2.07                | [0.88, 4.88]        |
| Kasper (A) 2005                                                                                             | 12           | 173          | 2       | 90          | 0.4%          | 3.12                | [0.71, 13.65]       |
| Kasper (B) 2005                                                                                             | 12           | 164          | 1       | 90          | 0.2%          | 6.59                | [0.87, 48.83]       |
| Kasper et al. 1995                                                                                          | 43           | 110          | 11      | 108         | 1.5%          | 3.84                | [2.09, 7.04]        |
| Kasper et al. 2011                                                                                          | 1            | 140          | 0       | 71          | 0.1%          | 1.53                | [0.06, 37.13]       |
| Kiev 1992                                                                                                   | 7            | 38           | 5       | 40          | 0.7%          | 1.47                | [0.51, 4.25]        |
| Learned et al. 2012                                                                                         | 26           | 166          | 12      | 156         | 1.4%          | 2.04                | [1.06, 3.89]        |
| Lepola et al. (A) 2003                                                                                      | 27           | 155          | 7       | 77          | 1.1%          | 1.92                | [0.87, 4.20]        |
| Lepola et al. (B) 2003                                                                                      | 23           | 160          | 7       | 77          | 1.0%          | 1.58                | [0.71, 3.52]        |
| LVM-MD-06                                                                                                   | 6            | 79           | 4       | 93          | 0.5%          | 1.77                | [0.52, 6.04]        |
| Lydiard et al. 1989                                                                                         | 6            | 18           | 4       | 18          | 0.6%          | 1.50                | [0.51, 4.43]        |
| Lydiard et al. 1997                                                                                         | 14           | 132          | 12      | 129         | 1.2%          | 1.14                | [0.55, 2.37]        |
| Mao et al (2015)                                                                                            | 10           | 19           | 0       | 18          | 0.1%          | 19.95               | [1.25, 317.32]      |
| McCrath et al. 2000                                                                                         | 16           | 49           | 3       | 52          | 0.6%          | 5.86                | [1.76, 19.23]       |
| MY-1043/BRL-029060/115 (A)                                                                                  | 76           | 264          | 7       | 59          | 1.2%          | 2.26                | [1.10, 4.64]        |
| MY-1043/BRL-029060/115 (B)                                                                                  | 70           | 289          | 7       | 59          | 1.2%          | 2.04                | [0.99, 4.21]        |
| MY-1045/BRL-029060/1 (PAR128) (A)                                                                           | 107          | 357          | 11      | 70          | 1.7%          | 1.91                | [1.08, 3.36]        |
| MY-1045/BRL-029060/1 (PAR128) (B)                                                                           | 81           | 351          | 11      | 70          | 1.7%          | 1.47                | [0.83, 2.61]        |
| NCT00688525 (A)                                                                                             | 41           | 322          | 8       | 109         | 1.2%          | 1.73                | [0.84, 3.58]        |
| NCT00688525 (B)                                                                                             | 37           | 324          | 8       | 109         | 1.2%          | 1.56                | [0.75, 3.24]        |
| NCT01020799                                                                                                 | 7            | 50           | 4       | 99          | 0.5%          | 3.46                | [1.06, 11.28]       |
| NCT01473381                                                                                                 | 55           | 282          | 23      | 281         | 2.1%          | 2.38                | [1.51, 3.77]        |
| Nemeroff et al. 2007                                                                                        | 22           | 104          | 8       | 102         | 1.1%          | 2.70                | [1.26, 5.78]        |
| Nierenberg et al (2007)                                                                                     | 33           | 274          | 12      | 137         | 1.5%          | 1.38                | [0.73, 2.58]        |
| Norton et al. 1984                                                                                          | 22           | 35           | 5       | 25          | 1.0%          | 3.14                | [1.38, 7.17]        |
| Olie et al. 1997                                                                                            | 26           | 129          | 12      | 129         | 1.4%          | 2.17                | [1.14, 4.10]        |
| PAR-29060/07/001                                                                                            | 12           | 13           | 9       | 12          | 2.7%          | 1.23                | [0.86, 1.77]        |
| Perahia et al (2006)                                                                                        | 6            | 97           | 1       | 99          | 0.2%          | 6.12                | [0.75, 49.93]       |
| Pesselow et al. 1989a                                                                                       | 8            | 40           | 4       | 42          | 0.6%          | 2.10                | [0.69, 6.43]        |
| Rapaport (A) 2008                                                                                           | 18           | 164          | 6       | 89          | 0.9%          | 1.63                | [0.67, 3.95]        |
| Rapaport (B) 2008                                                                                           | 18           | 173          | 7       | 89          | 1.0%          | 1.32                | [0.57, 3.05]        |
| Rathi et al. 2011                                                                                           | 31           | 120          | 14      | 120         | 1.6%          | 2.21                | [1.24, 3.95]        |
| Reimherr et al. 1990                                                                                        | 53           | 149          | 13      | 150         | 1.7%          | 4.10                | [2.34, 7.20]        |
| Rickels et al. 1986                                                                                         | 4            | 18           | 3       | 24          | 0.4%          | 1.78                | [0.45, 6.97]        |
| Rickels et al. 1992                                                                                         | 12           | 56           | 3       | 55          | 0.5%          | 3.93                | [1.17, 13.16]       |
| Roose 2004                                                                                                  | 6            | 87           | 6       | 90          | 0.6%          | 1.03                | [0.35, 3.08]        |
| Rudolph et al. 1999                                                                                         | 20           | 103          | 14      | 98          | 1.5%          | 1.36                | [0.73, 2.54]        |
| Schatzberg 2006                                                                                             | 23           | 100          | 14      | 96          | 1.6%          | 1.58                | [0.86, 2.88]        |
| Schneider 2003                                                                                              | 59           | 171          | 20      | 376         | 2.1%          | 6.49                | [4.04, 10.42]       |
| SCT-MD 02 (A) 2002                                                                                          | 20           | 135          | 9       | 84          | 1.1%          | 1.28                | [0.60, 2.74]        |
| SCT-MD 02 (B) 2002                                                                                          | 18           | 123          | 8       | 63          | 1.1%          | 1.15                | [0.53, 2.60]        |
| SCT-MD-13                                                                                                   | 20           | 135          | 8       | 132         | 1.1%          | 2.44                | [1.12, 5.35]        |
| SCT-MD-26                                                                                                   | 14           | 154          | 9       | 155         | 1.0%          | 1.57                | [0.70, 3.51]        |
| SCT-MD-27 (A)                                                                                               | 25           | 136          | 6       | 68          | 1.0%          | 2.08                | [0.90, 4.84]        |
| SCT-MD-27 (B)                                                                                               | 24           | 138          | 6       | 67          | 1.0%          | 1.94                | [0.83, 4.52]        |
| SCT-MD-35                                                                                                   | 10           | 138          | 8       | 135         | 0.9%          | 1.22                | [0.50, 3.00]        |
| Sheehan et al. 2009                                                                                         | 30           | 99           | 15      | 95          | 1.7%          | 1.92                | [1.10, 3.33]        |
| Shrivastava et al. 1992                                                                                     | 10           | 40           | 3       | 40          | 0.5%          | 3.33                | [0.99, 11.22]       |
| Smith et al. 1992                                                                                           | 10           | 39           | 3       | 38          | 0.5%          | 3.25                | [0.97, 10.90]       |
| Sramek et al. 1995                                                                                          | 17           | 72           | 8       | 72          | 1.1%          | 2.13                | [0.98, 4.61]        |
| Wade et al. 2002                                                                                            | 17           | 191          | 7       | 189         | 0.9%          | 2.40                | [1.02, 5.66]        |
| Walczak et al. 1996                                                                                         | 126          | 400          | 30      | 200         | 2.7%          | 2.10                | [1.46, 3.01]        |
| Wang et al. 2014                                                                                            | 47           | 156          | 30      | 155         | 2.4%          | 1.56                | [1.04, 2.32]        |
| WELL AK130927                                                                                               | 30           | 138          | 21      | 141         | 1.9%          | 1.46                | [0.88, 2.42]        |
| <b>Total (95% CI)</b>                                                                                       |              | <b>12257</b> |         | <b>8491</b> | <b>100.0%</b> | <b>2.09</b>         | <b>[1.90, 2.30]</b> |
| Total events                                                                                                |              | 2524         |         | 779         |               |                     |                     |
| Heterogeneity: Tau <sup>2</sup> = 0.05; Chi <sup>2</sup> = 129.71, df = 96 (P = 0.01); I <sup>2</sup> = 26% |              |              |         |             |               |                     |                     |
| Test for overall effect: Z = 15.45 (P < 0.00001)                                                            |              |              |         |             |               |                     |                     |

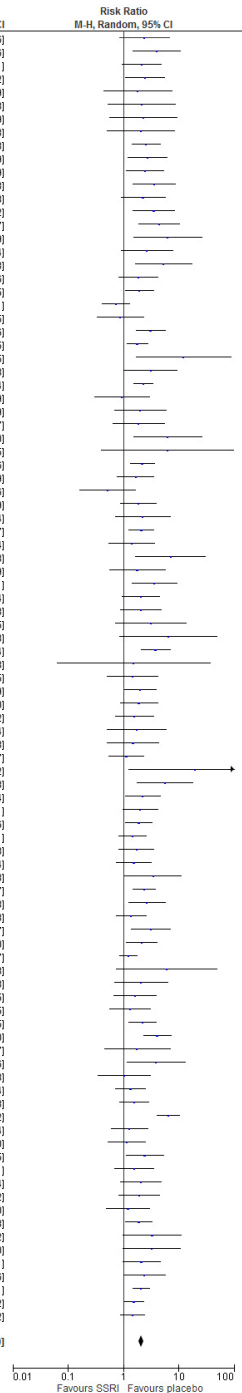

Supplement: 12888_2016_1173_MOESM10_ESM.pdf [file 12888_2016_1173_MOESM10_ESM.pdf]
