# Supplementary material for: Selective serotonin reuptake inhibitors versus placebo in patients with major depressive disorder. A systematic review with meta-analysis and Trial Sequential Analysis
Source: BMC Psychiatry. 2017 Feb 8;17:58. doi: 10.1186/s12888-016-1173-2 (PMC5299662; doi:10.1186/s12888-016-1173-2)

| Study or Subgroup                 | SSRI   |       | Placebo |       | Weight | Risk Ratio           |  | Risk Ratio          |  |
|-----------------------------------|--------|-------|---------|-------|--------|----------------------|--|---------------------|--|
|                                   | Events | Total | Events  | Total |        | M-H, Random, 95% CI  |  | M-H, Random, 95% CI |  |
| 29060/449 (A)                     | 24     | 108   | 5       | 55    | 1.7%   | 2.44 [0.99, 6.06]    |  |                     |  |
| 29060/449 (B)                     | 25     | 112   | 5       | 55    | 1.7%   | 2.46 [0.99, 6.07]    |  |                     |  |
| 29060/448 (A)                     | 23     | 106   | 3       | 51    | 1.0%   | 3.69 [1.16, 11.72]   |  |                     |  |
| 29060/448 (B)                     | 21     | 106   | 3       | 52    | 1.0%   | 3.43 [1.07, 10.99]   |  |                     |  |
| 29060/785 (A)                     | 14     | 103   | 3       | 27    | 1.0%   | 1.22 [0.38, 3.95]    |  |                     |  |
| 29060/785 (B)                     | 8      | 96    | 2       | 26    | 0.6%   | 1.08 [0.24, 4.80]    |  |                     |  |
| 29060/785 (C)                     | 15     | 107   | 2       | 26    | 0.7%   | 1.82 [0.44, 7.48]    |  |                     |  |
| 29060/785 (D)                     | 20     | 100   | 2       | 26    | 0.7%   | 2.60 [0.65, 10.42]   |  |                     |  |
| Ball et al (2014)                 | 19     | 79    | 16      | 79    | 4.0%   | 1.19 [0.66, 2.14]    |  |                     |  |
| Cassano et al. 1986               | 17     | 161   | 2       | 149   | 0.7%   | 7.87 [1.85, 33.47]   |  |                     |  |
| Claghorn 1992a                    | 7      | 36    | 1       | 35    | 0.3%   | 6.81 [0.88, 52.50]   |  |                     |  |
| Claghorn et al. 1996              | 19     | 47    | 4       | 46    | 1.4%   | 4.65 [1.71, 12.62]   |  |                     |  |
| Cohn et al. 1991                  | 9      | 40    | 7       | 40    | 1.8%   | 1.29 [0.53, 3.12]    |  |                     |  |
| Coleman et al. 2001               | 17     | 154   | 6       | 152   | 1.7%   | 2.80 [1.13, 6.90]    |  |                     |  |
| Corrigan et al. 2000              | 3      | 33    | 2       | 34    | 0.5%   | 1.55 [0.28, 8.66]    |  |                     |  |
| Croft et al. 1999                 | 20     | 118   | 7       | 119   | 2.1%   | 2.88 [1.27, 6.56]    |  |                     |  |
| Dominguez et al. 1985             | 8      | 33    | 2       | 31    | 0.6%   | 3.76 [0.86, 16.34]   |  |                     |  |
| Doogan et al. 1994                | 2      | 99    | 0       | 101   | 0.2%   | 5.10 [0.25, 104.90]  |  |                     |  |
| Dunbar et al. 1991                | 57     | 240   | 26      | 240   | 7.6%   | 2.19 [1.43, 3.36]    |  |                     |  |
| Fabre 1992                        | 11     | 39    | 6       | 38    | 1.8%   | 1.79 [0.73, 4.34]    |  |                     |  |
| Fabre et al. 1995                 | 38     | 278   | 7       | 91    | 2.3%   | 1.78 [0.82, 3.84]    |  |                     |  |
| Fabre et al. 1996                 | 19     | 46    | 2       | 44    | 0.7%   | 9.09 [2.25, 36.75]   |  |                     |  |
| Feighner et al. 1989b             | 9      | 31    | 1       | 19    | 0.4%   | 5.52 [0.76, 40.17]   |  |                     |  |
| Feighner et al. 1999              | 83     | 521   | 5       | 129   | 1.8%   | 4.11 [1.70, 9.93]    |  |                     |  |
| Goldstein et al (2002)            | 7      | 33    | 7       | 70    | 1.5%   | 2.12 [0.81, 5.55]    |  |                     |  |
| Goldstein et al. 2004             | 7      | 87    | 2       | 89    | 0.6%   | 3.58 [0.76, 16.76]   |  |                     |  |
| Griebel et al. 2012 a             | 5      | 84    | 1       | 75    | 0.3%   | 4.46 [0.53, 37.35]   |  |                     |  |
| Griebel et al. 2012 b             | 6      | 80    | 2       | 77    | 0.6%   | 2.89 [0.60, 13.87]   |  |                     |  |
| Higuchi et al. (A) 2011           | 16     | 161   | 2       | 86    | 0.7%   | 4.27 [1.01, 18.15]   |  |                     |  |
| Higuchi et al. (B) 2011           | 7      | 83    | 1       | 86    | 0.3%   | 7.25 [0.91, 57.68]   |  |                     |  |
| Itil et al. 1983                  | 11     | 22    | 5       | 22    | 1.8%   | 2.20 [0.92, 5.29]    |  |                     |  |
| Kasper (A) 2005                   | 4      | 173   | 1       | 90    | 0.3%   | 2.08 [0.24, 18.34]   |  |                     |  |
| Kasper (B) 2005                   | 0      | 164   | 0       | 90    |        | Not estimable        |  |                     |  |
| Kasper et al. 1995                | 21     | 110   | 4       | 108   | 1.3%   | 5.15 [1.83, 14.52]   |  |                     |  |
| Lepola et al. (A) 2003            | 8      | 155   | 1       | 77    | 0.3%   | 3.97 [0.51, 31.21]   |  |                     |  |
| Lepola et al. (B) 2003            | 5      | 160   | 1       | 77    | 0.3%   | 2.41 [0.29, 20.24]   |  |                     |  |
| LVM-MD-06                         | 6      | 79    | 4       | 93    | 0.9%   | 1.77 [0.52, 6.04]    |  |                     |  |
| Lydiard et al. 1997               | 14     | 132   | 7       | 129   | 1.8%   | 1.95 [0.82, 4.69]    |  |                     |  |
| MY-1043/BRL-029060/115 (A)        | 69     | 284   | 4       | 59    | 1.5%   | 3.58 [1.36, 9.44]    |  |                     |  |
| MY-1043/BRL-029060/115 (B)        | 51     | 289   | 5       | 59    | 1.8%   | 2.08 [0.87, 4.99]    |  |                     |  |
| MY-1045/BRL-029060/1 (PAR128) (A) | 84     | 357   | 5       | 70    | 1.9%   | 3.29 [1.39, 7.82]    |  |                     |  |
| MY-1045/BRL-029060/1 (PAR128) (B) | 58     | 351   | 5       | 70    | 1.8%   | 2.31 [0.96, 5.56]    |  |                     |  |
| NCT00668525 (A)                   | 17     | 322   | 2       | 109   | 0.7%   | 2.88 [0.68, 12.25]   |  |                     |  |
| NCT00668525 (B)                   | 26     | 324   | 2       | 109   | 0.7%   | 4.37 [1.06, 18.13]   |  |                     |  |
| NCT01020799                       | 3      | 50    | 5       | 99    | 0.7%   | 1.19 [0.30, 4.77]    |  |                     |  |
| NCT01473381                       | 22     | 282   | 10      | 281   | 2.6%   | 2.19 [1.06, 4.54]    |  |                     |  |
| Nierenberg et al (2007)           | 18     | 274   | 5       | 137   | 1.5%   | 1.80 [0.68, 4.75]    |  |                     |  |
| Olie et al.1997                   | 5      | 129   | 0       | 129   | 0.2%   | 11.00 [0.61, 196.91] |  |                     |  |
| PAR 29060.07.001                  | 5      | 13    | 2       | 12    | 0.7%   | 2.31 [0.55, 9.74]    |  |                     |  |
| Perahia et al (2006)              | 5      | 97    | 0       | 99    | 0.2%   | 11.22 [0.63, 200.28] |  |                     |  |
| Peselow et al. 1989a              | 3      | 40    | 2       | 42    | 0.5%   | 1.57 [0.28, 8.94]    |  |                     |  |
| Rapaport (A) 2008                 | 8      | 164   | 3       | 89    | 0.8%   | 1.45 [0.39, 5.32]    |  |                     |  |
| Rapaport (B) 2008                 | 15     | 173   | 2       | 89    | 0.7%   | 3.86 [0.90, 16.50]   |  |                     |  |
| Ratti et al. 2011                 | 7      | 120   | 7       | 120   | 1.3%   | 1.00 [0.36, 2.76]    |  |                     |  |
| Reimherr et al. 1990              | 29     | 149   | 18      | 150   | 4.7%   | 1.62 [0.94, 2.79]    |  |                     |  |
| Rickels et al. 1992               | 13     | 55    | 4       | 56    | 1.2%   | 3.31 [1.15, 9.52]    |  |                     |  |
| Roose 2004                        | 5      | 87    | 4       | 90    | 0.8%   | 1.29 [0.36, 4.66]    |  |                     |  |
| Rudolph et al. 1999               | 12     | 103   | 6       | 98    | 1.6%   | 1.90 [0.74, 4.87]    |  |                     |  |
| Schatzberg 2006                   | 6      | 100   | 1       | 96    | 0.3%   | 5.76 [0.71, 46.96]   |  |                     |  |
| Schneider 2003                    | 38     | 371   | 16      | 376   | 4.3%   | 2.41 [1.37, 4.24]    |  |                     |  |
| SCT-MD 02 (A) 2002                | 13     | 125   | 3       | 64    | 0.9%   | 2.22 [0.66, 7.51]    |  |                     |  |
| SCT-MD 02 (B) 2002                | 9      | 123   | 3       | 63    | 0.9%   | 1.54 [0.43, 5.48]    |  |                     |  |
| SCT-MD-13                         | 12     | 132   | 5       | 135   | 1.4%   | 2.45 [0.89, 6.78]    |  |                     |  |
| SCT-MD-27 (A)                     | 14     | 136   | 2       | 67    | 0.7%   | 3.45 [0.81, 14.74]   |  |                     |  |
| SCT-MD-27 (B)                     | 16     | 138   | 2       | 68    | 0.7%   | 3.94 [0.93, 16.65]   |  |                     |  |
| Shrivastava et al. 1992           | 10     | 40    | 6       | 40    | 1.7%   | 1.67 [0.67, 4.15]    |  |                     |  |
| Silverstone et al. 1999           | 17     | 121   | 7       | 119   | 2.0%   | 2.39 [1.03, 5.55]    |  |                     |  |
| Smith et al.1992                  | 7      | 39    | 3       | 38    | 0.9%   | 2.27 [0.63, 8.15]    |  |                     |  |
| SND103288                         | 17     | 172   | 11      | 160   | 2.6%   | 1.44 [0.69, 2.97]    |  |                     |  |
| Wakelin 1986                      | 5      | 32    | 2       | 14    | 0.6%   | 1.09 [0.24, 4.97]    |  |                     |  |
| Walczak et al. 1996               | 77     | 400   | 16      | 200   | 5.3%   | 2.41 [1.44, 4.01]    |  |                     |  |
| Wang et al 2014                   | 13     | 156   | 6       | 155   | 1.6%   | 2.15 [0.84, 5.52]    |  |                     |  |
| WELL AK130926                     | 11     | 149   | 8       | 137   | 1.8%   | 1.26 [0.52, 3.05]    |  |                     |  |
| WELL AK130927                     | 11     | 138   | 6       | 141   | 1.5%   | 1.87 [0.71, 4.92]    |  |                     |  |

**Total (95% CI)** 10351 6674 100.0% 2.25 [2.00, 2.53]  
 Total events 1336 345  
 Heterogeneity:  $\tau^2 = 0.00$ ;  $\chi^2 = 50.26$ ,  $df = 72$  ( $P = 0.98$ );  $I^2 = 0\%$   
 Test for overall effect:  $Z = 13.43$  ( $P < 0.00001$ )

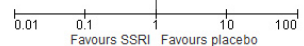

Supplement: Supplementary file 11 — Meta-analysis of somnolence. (PDF 459 kb) [file 12888_2016_1173_MOESM11_ESM.pdf]
