# Supplementary material for: Selective serotonin reuptake inhibitors versus placebo in patients with major depressive disorder. A systematic review with meta-analysis and Trial Sequential Analysis
Source: PubMed Central journal article supplement (PMC5299662; doi:10.1186/s12888-016-1173-2), 2017-02-08

| Study or Subgroup                 | SSRI   |       | Placebo |       | Weight | Risk Ratio          |                     | Risk Ratio<br>M-H, Random, 95% CI |
|-----------------------------------|--------|-------|---------|-------|--------|---------------------|---------------------|-----------------------------------|
|                                   | Events | Total | Events  | Total |        | M-H, Random, 95% CI | M-H, Random, 95% CI |                                   |
| 29060/449 (A)                     | 19     | 108   | 4       | 55    | 0.9%   | 2.42                | [0.87, 6.76]        |                                   |
| 29060/449 (B)                     | 7      | 112   | 4       | 55    | 0.7%   | 0.86                | [0.26, 2.81]        |                                   |
| 29060/448 (A)                     | 18     | 106   | 3       | 51    | 0.7%   | 2.89                | [0.89, 9.35]        |                                   |
| 29060/448 (B)                     | 21     | 106   | 4       | 52    | 0.9%   | 2.58                | [0.93, 7.12]        |                                   |
| 29060/785 (A)                     | 16     | 103   | 2       | 27    | 0.5%   | 2.10                | [0.51, 8.57]        |                                   |
| 29060/785 (B)                     | 13     | 96    | 2       | 26    | 0.5%   | 1.76                | [0.42, 7.31]        |                                   |
| 29060/785 (C)                     | 10     | 107   | 2       | 26    | 0.4%   | 1.21                | [0.28, 5.21]        |                                   |
| 29060/785 (D)                     | 13     | 100   | 1       | 26    | 0.2%   | 3.38                | [0.46, 24.67]       |                                   |
| Ball et al. (2014)                | 12     | 79    | 6       | 79    | 1.1%   | 2.00                | [0.79, 5.06]        |                                   |
| Blumenthal et al. 2007            | 15     | 49    | 6       | 49    | 1.3%   | 2.50                | [1.06, 5.91]        |                                   |
| Bose 2008                         | 19     | 130   | 5       | 134   | 1.0%   | 3.92                | [1.51, 10.18]       |                                   |
| Burke et al. (A) 2002             | 10     | 119   | 7       | 122   | 1.1%   | 1.46                | [0.58, 3.72]        |                                   |
| Burke et al. (B) 2002             | 14     | 125   | 7       | 122   | 1.2%   | 1.95                | [0.82, 4.67]        |                                   |
| Burke et al. (C) 2002             | 11     | 125   | 7       | 122   | 1.1%   | 1.53                | [0.61, 3.83]        |                                   |
| Byerley et al. 1988               | 0      | 32    | 16      | 29    | 0.1%   | 0.03                | [0.00, 0.44]        |                                   |
| Claghorn 1992a                    | 6      | 36    | 3       | 35    | 0.5%   | 1.94                | [0.53, 7.17]        |                                   |
| Claghorn et al. 1996              | 9      | 47    | 1       | 46    | 0.2%   | 8.81                | [1.16, 66.77]       |                                   |
| Coleman et al. 1999               | 21     | 115   | 17      | 121   | 2.7%   | 1.30                | [0.72, 2.34]        |                                   |
| Coleman et al. 2001               | 18     | 154   | 13      | 152   | 2.0%   | 1.37                | [0.69, 2.69]        |                                   |
| Croft et al. 1999                 | 31     | 118   | 13      | 119   | 2.6%   | 2.40                | [1.33, 4.36]        |                                   |
| Davidson et al. 2002              | 42     | 111   | 22      | 116   | 4.7%   | 2.00                | [1.28, 3.11]        |                                   |
| Dunlop et al (A)                  | 19     | 105   | 2       | 20    | 0.5%   | 1.81                | [0.46, 7.17]        |                                   |
| Dunlop et al (B)                  | 17     | 104   | 1       | 19    | 0.2%   | 3.11                | [0.44, 21.97]       |                                   |
| Dunlop et al (C)                  | 14     | 107   | 1       | 19    | 0.2%   | 2.49                | [0.35, 17.81]       |                                   |
| Edwards et al. 1993               | 1      | 21    | 0       | 20    | 0.1%   | 2.86                | [0.12, 66.44]       |                                   |
| Fabre et al. 1987                 | 4      | 72    | 0       | 12    | 0.1%   | 1.60                | [0.09, 28.03]       |                                   |
| Fabre et al. 1995                 | 60     | 278   | 8       | 91    | 1.9%   | 2.46                | [1.22, 4.94]        |                                   |
| Fabre et al. 1996                 | 7      | 46    | 5       | 44    | 0.8%   | 1.34                | [0.46, 3.91]        |                                   |
| Fava et al. 2005                  | 7      | 47    | 4       | 43    | 0.7%   | 1.60                | [0.50, 5.09]        |                                   |
| Feighner et al. 1999              | 73     | 521   | 14      | 129   | 3.2%   | 1.29                | [0.75, 2.21]        |                                   |
| Goldstein et al (2002)            | 10     | 33    | 7       | 70    | 1.2%   | 3.03                | [1.27, 7.25]        |                                   |
| Griebel et al. 2012 a             | 7      | 84    | 1       | 75    | 0.2%   | 6.25                | [0.79, 49.63]       |                                   |
| Griebel et al. 2012 b             | 6      | 80    | 5       | 77    | 0.7%   | 1.16                | [0.37, 3.63]        |                                   |
| Higuchi et al. (A) 2011           | 7      | 161   | 4       | 86    | 0.6%   | 0.93                | [0.29, 3.10]        |                                   |
| Higuchi et al. (B) 2011           | 7      | 83    | 4       | 86    | 0.7%   | 1.81                | [0.55, 5.97]        |                                   |
| Kasper (A) 2005                   | 3      | 173   | 5       | 90    | 0.5%   | 0.31                | [0.08, 1.28]        |                                   |
| Kasper (B) 2005                   | 8      | 164   | 4       | 90    | 0.7%   | 1.10                | [0.34, 3.54]        |                                   |
| Learned et al. 2012               | 16     | 166   | 9       | 156   | 1.5%   | 1.67                | [0.76, 3.67]        |                                   |
| Lepola et al. (A) 2003            | 10     | 155   | 2       | 77    | 0.4%   | 2.48                | [0.56, 11.06]       |                                   |
| Lepola et al. (B) 2003            | 12     | 160   | 3       | 77    | 0.6%   | 1.93                | [0.56, 6.82]        |                                   |
| LVM-MD-06                         | 9      | 79    | 8       | 93    | 1.1%   | 1.32                | [0.54, 3.27]        |                                   |
| MY-1043/BRL-029060/115 (A)        | 45     | 284   | 5       | 59    | 1.2%   | 1.87                | [0.78, 4.51]        |                                   |
| MY-1043/BRL-029060/115 (B)        | 42     | 289   | 4       | 59    | 1.0%   | 2.14                | [0.80, 5.75]        |                                   |
| MY-1045/BRL-029060/1 (PAR128) (A) | 49     | 357   | 8       | 70    | 1.9%   | 1.20                | [0.60, 2.42]        |                                   |
| MY-1045/BRL-029060/1 (PAR128) (B) | 63     | 351   | 8       | 70    | 2.0%   | 1.57                | [0.79, 3.13]        |                                   |
| NCT00668525 (A)                   | 30     | 322   | 7       | 109   | 1.5%   | 1.45                | [0.66, 3.21]        |                                   |
| NCT00668525 (B)                   | 35     | 324   | 7       | 109   | 1.5%   | 1.68                | [0.77, 3.68]        |                                   |
| NCT01020799                       | 7      | 50    | 4       | 99    | 0.7%   | 3.46                | [1.06, 11.28]       |                                   |
| NCT01473381                       | 30     | 282   | 26      | 281   | 3.8%   | 1.15                | [0.70, 1.89]        |                                   |
| Nemeroff et al. 2007              | 13     | 104   | 9       | 102   | 1.4%   | 1.42                | [0.63, 3.17]        |                                   |
| Nierenberg et al. (2007)          | 33     | 274   | 11      | 137   | 2.2%   | 1.50                | [0.78, 2.88]        |                                   |
| Norton et al. 1984                | 8      | 35    | 2       | 25    | 0.4%   | 2.86                | [0.66, 12.33]       |                                   |
| Olie et al. 1997                  | 6      | 129   | 3       | 129   | 0.5%   | 2.00                | [0.51, 7.83]        |                                   |
| PAR 29060.07.001                  | 4      | 13    | 1       | 12    | 0.2%   | 3.69                | [0.48, 28.57]       |                                   |
| Peselow et al. 1989a              | 2      | 40    | 4       | 42    | 0.3%   | 0.53                | [0.10, 2.71]        |                                   |
| Rapaport (A) 2008                 | 19     | 164   | 11      | 89    | 1.9%   | 0.94                | [0.47, 1.88]        |                                   |
| Rapaport (B) 2008                 | 26     | 173   | 10      | 89    | 2.0%   | 1.34                | [0.68, 2.65]        |                                   |
| Ratti et al. 2011                 | 11     | 120   | 5       | 120   | 0.9%   | 2.20                | [0.79, 6.14]        |                                   |
| Reimherr et al. 1990              | 35     | 149   | 15      | 150   | 3.0%   | 2.35                | [1.34, 4.12]        |                                   |
| Rickels et al. 1992               | 15     | 55    | 4       | 56    | 0.9%   | 3.82                | [1.35, 10.78]       |                                   |
| Roose 2004                        | 13     | 87    | 6       | 90    | 1.1%   | 2.24                | [0.89, 5.63]        |                                   |
| Rudolph et al. 1999               | 19     | 103   | 9       | 98    | 1.7%   | 2.01                | [0.96, 4.22]        |                                   |
| Schatzberg 2006                   | 13     | 100   | 14      | 96    | 1.9%   | 0.89                | [0.44, 1.80]        |                                   |
| Schneider 2003                    | 68     | 371   | 25      | 376   | 4.9%   | 2.76                | [1.78, 4.26]        |                                   |
| SCT-MD 02 (A) 2002                | 12     | 125   | 6       | 64    | 1.1%   | 1.02                | [0.40, 2.60]        |                                   |
| SCT-MD 02 (B) 2002                | 18     | 123   | 5       | 63    | 1.1%   | 1.84                | [0.72, 4.74]        |                                   |
| SCT-MD-13                         | 19     | 132   | 5       | 135   | 1.0%   | 3.89                | [1.49, 10.10]       |                                   |
| SCT-MD-26                         | 15     | 154   | 7       | 155   | 1.2%   | 2.16                | [0.90, 5.14]        |                                   |
| SCT-MD-27 (A)                     | 10     | 136   | 4       | 67    | 0.7%   | 1.23                | [0.40, 3.78]        |                                   |
| SCT-MD-27 (B)                     | 19     | 138   | 5       | 68    | 1.1%   | 1.87                | [0.73, 4.80]        |                                   |
| SCT-MD-35                         | 6      | 138   | 8       | 135   | 0.9%   | 0.73                | [0.26, 2.06]        |                                   |
| Smith et al. 1992                 | 2      | 39    | 4       | 38    | 0.3%   | 0.49                | [0.09, 2.51]        |                                   |
| Tollefson et al. 1995             | 48     | 335   | 30      | 336   | 5.1%   | 1.60                | [1.04, 2.47]        |                                   |
| Walczak et al. 1996               | 51     | 400   | 24      | 200   | 4.5%   | 1.06                | [0.67, 1.67]        |                                   |
| Wang et al 2014                   | 19     | 156   | 11      | 155   | 1.9%   | 1.72                | [0.85, 3.49]        |                                   |
| WELL.AK130926                     | 15     | 149   | 12      | 137   | 1.8%   | 1.15                | [0.56, 2.37]        |                                   |
| WELL.AK130927                     | 16     | 138   | 10      | 141   | 1.6%   | 1.63                | [0.77, 3.48]        |                                   |

Total (95% CI) 11056 7099 100.0% 1.66 [1.51, 1.83]  
 Total events 1458 561  
 Heterogeneity: Tau<sup>2</sup> = 0.00; Chi<sup>2</sup> = 75.02, df = 76 (P = 0.51); I<sup>2</sup> = 0%  
 Test for overall effect: Z = 10.28 (P < 0.00001)

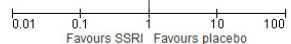

Supplement: 12888_2016_1173_MOESM14_ESM.pdf [file 12888_2016_1173_MOESM14_ESM.pdf]
