# Supplementary material for: Selective serotonin reuptake inhibitors versus placebo in patients with major depressive disorder. A systematic review with meta-analysis and Trial Sequential Analysis
Source: PubMed Central journal article supplement (PMC5299662; doi:10.1186/s12888-016-1173-2), 2017-02-08

| Study or Subgroup                                                                                         | SSRI   |       | placebo |       | Weight | Risk Ratio          |                     | Risk Ratio |  |
|-----------------------------------------------------------------------------------------------------------|--------|-------|---------|-------|--------|---------------------|---------------------|------------|--|
|                                                                                                           | Events | Total | Events  | Total |        | M-H, Random, 95% CI | M-H, Random, 95% CI |            |  |
| 29060/449 (A)                                                                                             | 20     | 108   | 5       | 55    | 1.1%   | 2.04                | [0.81, 5.14]        |            |  |
| 29060/449 (B)                                                                                             | 21     | 112   | 6       | 55    | 1.3%   | 1.72                | [0.74, 4.01]        |            |  |
| 29060/448 (A)                                                                                             | 15     | 106   | 4       | 51    | 0.8%   | 1.80                | [0.63, 5.16]        |            |  |
| 29060/448 (B)                                                                                             | 17     | 106   | 4       | 52    | 0.8%   | 2.08                | [0.74, 5.88]        |            |  |
| 29060/785 (A)                                                                                             | 13     | 103   | 3       | 27    | 0.6%   | 1.14                | [0.35, 3.70]        |            |  |
| 29060/785 (B)                                                                                             | 17     | 96    | 2       | 26    | 0.5%   | 2.30                | [0.57, 9.52]        |            |  |
| 29060/785 (C)                                                                                             | 19     | 107   | 2       | 26    | 0.5%   | 2.31                | [0.57, 9.29]        |            |  |
| 29060/785 (D)                                                                                             | 10     | 100   | 2       | 26    | 0.4%   | 1.30                | [0.30, 5.57]        |            |  |
| Bali et al (2014)                                                                                         | 6      | 79    | 2       | 79    | 0.4%   | 3.00                | [0.62, 14.41]       |            |  |
| Bose 2008                                                                                                 | 10     | 130   | 17      | 134   | 1.6%   | 0.61                | [0.29, 1.27]        |            |  |
| Burke et al. (A) 2002                                                                                     | 10     | 119   | 3       | 122   | 0.6%   | 3.42                | [0.96, 12.11]       |            |  |
| Burke et al. (B) 2002                                                                                     | 14     | 125   | 3       | 122   | 0.6%   | 4.55                | [1.34, 15.45]       |            |  |
| Burke et al. (C) 2002                                                                                     | 11     | 125   | 3       | 122   | 0.6%   | 3.58                | [1.02, 12.52]       |            |  |
| Byerley et al. 1988                                                                                       | 13     | 32    | 7       | 29    | 1.5%   | 1.68                | [0.78, 3.63]        |            |  |
| Cassano et al. 1986                                                                                       | 15     | 161   | 6       | 149   | 1.1%   | 2.31                | [0.92, 5.81]        |            |  |
| Claghorn et al. 1996                                                                                      | 3      | 47    | 5       | 46    | 0.5%   | 0.59                | [0.15, 2.32]        |            |  |
| Cohn et al. 1985                                                                                          | 11     | 54    | 4       | 58    | 0.8%   | 2.95                | [1.00, 8.72]        |            |  |
| Cohn et al. 1991                                                                                          | 9      | 40    | 5       | 40    | 0.9%   | 1.80                | [0.66, 4.90]        |            |  |
| Coleman et al. 1999                                                                                       | 20     | 115   | 8       | 121   | 1.5%   | 2.63                | [1.21, 5.73]        |            |  |
| Coleman et al. 2001                                                                                       | 15     | 154   | 10      | 152   | 1.5%   | 1.48                | [0.69, 3.19]        |            |  |
| Corrigan et al. 2000                                                                                      | 6      | 33    | 1       | 34    | 0.2%   | 6.18                | [0.79, 48.60]       |            |  |
| Croft et al. 1999                                                                                         | 21     | 118   | 5       | 119   | 1.0%   | 4.24                | [1.65, 10.86]       |            |  |
| Dominguez et al. 1985                                                                                     | 9      | 33    | 5       | 31    | 0.9%   | 1.69                | [0.64, 4.49]        |            |  |
| Dubé et al. 2009                                                                                          | 2      | 62    | 4       | 138   | 0.3%   | 1.11                | [0.21, 5.92]        |            |  |
| Dunlop et al (A)                                                                                          | 12     | 105   | 4       | 20    | 0.9%   | 0.57                | [0.20, 1.59]        |            |  |
| Dunlop et al (B)                                                                                          | 22     | 104   | 4       | 19    | 1.0%   | 1.00                | [0.39, 2.59]        |            |  |
| Dunlop et al (C)                                                                                          | 29     | 107   | 3       | 19    | 0.8%   | 1.72                | [0.58, 5.07]        |            |  |
| Fabre et al. 1985                                                                                         | 5      | 22    | 1       | 26    | 0.2%   | 5.91                | [0.75, 46.96]       |            |  |
| Fabre et al. 1995                                                                                         | 33     | 278   | 8       | 91    | 1.7%   | 1.35                | [0.65, 2.82]        |            |  |
| Fabre et al. 1996                                                                                         | 7      | 46    | 2       | 44    | 0.4%   | 3.35                | [0.74, 15.25]       |            |  |
| Fava et al. (A) 1998                                                                                      | 16     | 55    | 1       | 9     | 0.3%   | 2.62                | [0.39, 17.39]       |            |  |
| Fava et al. (B) 1998                                                                                      | 11     | 54    | 1       | 10    | 0.2%   | 2.04                | [0.29, 14.07]       |            |  |
| Fava et al. 2005                                                                                          | 5      | 47    | 6       | 43    | 0.7%   | 0.76                | [0.25, 2.32]        |            |  |
| Feighner et al. 1989b                                                                                     | 4      | 31    | 3       | 19    | 0.5%   | 0.82                | [0.20, 3.26]        |            |  |
| Feighner et al. 1999                                                                                      | 94     | 521   | 14      | 129   | 3.3%   | 1.66                | [0.98, 2.82]        |            |  |
| Goldstein et al (2002)                                                                                    | 3      | 33    | 5       | 70    | 0.5%   | 1.27                | [0.32, 5.01]        |            |  |
| Goldstein et al. 2004                                                                                     | 7      | 87    | 5       | 89    | 0.7%   | 1.43                | [0.47, 4.34]        |            |  |
| Griebel et al. 2012 a                                                                                     | 3      | 84    | 3       | 75    | 0.4%   | 0.89                | [0.19, 4.29]        |            |  |
| Griebel et al. 2012 b                                                                                     | 0      | 80    | 3       | 77    | 0.1%   | 0.14                | [0.01, 2.62]        |            |  |
| Kasper (A) 2005                                                                                           | 4      | 173   | 2       | 90    | 0.3%   | 1.04                | [0.19, 5.57]        |            |  |
| Kasper (B) 2005                                                                                           | 3      | 164   | 2       | 90    | 0.3%   | 0.82                | [0.14, 4.84]        |            |  |
| Kasper et al. 1995                                                                                        | 13     | 110   | 9       | 108   | 1.4%   | 1.42                | [0.63, 3.18]        |            |  |
| Kasper et al. 2011                                                                                        | 3      | 140   | 3       | 71    | 0.4%   | 0.51                | [0.11, 2.45]        |            |  |
| Kranzler et al. (A) 2006                                                                                  | 11     | 89    | 8       | 100   | 1.2%   | 1.54                | [0.65, 3.67]        |            |  |
| Kranzler et al. (B) 2006                                                                                  | 11     | 70    | 7       | 69    | 1.2%   | 1.55                | [0.64, 3.76]        |            |  |
| Learned et al. 2012                                                                                       | 7      | 166   | 8       | 156   | 0.9%   | 0.82                | [0.31, 2.21]        |            |  |
| Lepola et al. (A) 2003                                                                                    | 10     | 155   | 2       | 77    | 0.4%   | 2.48                | [0.56, 11.06]       |            |  |
| Lepola et al. (B) 2003                                                                                    | 7      | 160   | 1       | 77    | 0.2%   | 3.37                | [0.42, 28.90]       |            |  |
| LVM-MD-06                                                                                                 | 5      | 79    | 1       | 93    | 0.2%   | 5.89                | [0.70, 49.33]       |            |  |
| Lydvard et al. 1997                                                                                       | 8      | 132   | 3       | 129   | 0.5%   | 2.61                | [0.71, 9.61]        |            |  |
| Mao et al (2015)                                                                                          | 4      | 19    | 0       | 18    | 0.1%   | 8.55                | [0.49, 148.33]      |            |  |
| Muijen et al. 1988                                                                                        | 4      | 26    | 1       | 28    | 0.2%   | 4.31                | [0.51, 36.08]       |            |  |
| MY-1043/BRL-029060/115 (A)                                                                                | 57     | 284   | 9       | 59    | 2.2%   | 1.32                | [0.69, 2.51]        |            |  |
| MY-1043/BRL-029060/115 (B)                                                                                | 60     | 289   | 9       | 59    | 2.2%   | 1.36                | [0.72, 2.59]        |            |  |
| MY-1045/BRL-029060/1 (PAR128) (A)                                                                         | 73     | 357   | 11      | 70    | 2.7%   | 1.30                | [0.73, 2.32]        |            |  |
| MY-1045/BRL-029060/1 (PAR128) (B)                                                                         | 76     | 351   | 12      | 70    | 3.0%   | 1.26                | [0.73, 2.19]        |            |  |
| NCT00668625 (A)                                                                                           | 19     | 322   | 3       | 109   | 0.6%   | 2.14                | [0.65, 7.10]        |            |  |
| NCT00668625 (B)                                                                                           | 34     | 324   | 4       | 109   | 0.9%   | 2.86                | [1.04, 7.88]        |            |  |
| NCT01473361                                                                                               | 12     | 282   | 8       | 281   | 1.2%   | 1.49                | [0.62, 3.60]        |            |  |
| Nemeroff et al. 2007                                                                                      | 15     | 104   | 14      | 102   | 2.0%   | 0.05                | [0.53, 2.09]        |            |  |
| Nierenberg et al (2007)                                                                                   | 21     | 274   | 9       | 137   | 1.6%   | 1.17                | [0.55, 2.48]        |            |  |
| Olie et al. 1997                                                                                          | 11     | 129   | 11      | 129   | 1.4%   | 1.00                | [0.45, 2.22]        |            |  |
| PAR 29060.07.001                                                                                          | 3      | 13    | 3       | 12    | 0.5%   | 0.92                | [0.23, 3.72]        |            |  |
| Perahia et al (2006)                                                                                      | 6      | 97    | 0       | 99    | 0.1%   | 13.27               | [0.76, 232.31]      |            |  |
| Rapaport (A) 2008                                                                                         | 14     | 164   | 6       | 89    | 1.1%   | 1.27                | [0.50, 3.18]        |            |  |
| Rapaport (B) 2008                                                                                         | 9      | 173   | 5       | 89    | 0.8%   | 0.93                | [0.32, 2.68]        |            |  |
| Ratti et al. 2011                                                                                         | 11     | 120   | 6       | 120   | 1.0%   | 1.83                | [0.70, 4.80]        |            |  |
| Reimherr et al. 1990                                                                                      | 26     | 149   | 16      | 150   | 2.7%   | 1.84                | [0.92, 2.92]        |            |  |
| Rickels et al. 1992                                                                                       | 9      | 55    | 6       | 56    | 1.0%   | 1.53                | [0.58, 4.00]        |            |  |
| Roose 2004                                                                                                | 3      | 87    | 5       | 87    | 0.5%   | 3.62                | [0.15, 2.52]        |            |  |
| Schatzberg 2006                                                                                           | 11     | 100   | 4       | 96    | 0.7%   | 2.84                | [0.87, 8.01]        |            |  |
| Schneider 2003                                                                                            | 35     | 371   | 23      | 376   | 3.5%   | 1.54                | [0.93, 2.58]        |            |  |
| SCT-MD 02 (A) 2002                                                                                        | 17     | 125   | 4       | 64    | 0.8%   | 2.18                | [0.76, 6.20]        |            |  |
| SCT-MD 02 (B) 2002                                                                                        | 14     | 123   | 4       | 63    | 0.8%   | 1.79                | [0.62, 5.22]        |            |  |
| SCT-MD-13                                                                                                 | 10     | 132   | 17      | 135   | 1.6%   | 0.60                | [0.29, 1.27]        |            |  |
| SCT-MD-26                                                                                                 | 16     | 154   | 9       | 155   | 1.5%   | 1.79                | [0.82, 3.93]        |            |  |
| SCT-MD-27 (A)                                                                                             | 20     | 136   | 7       | 67    | 1.4%   | 1.41                | [0.63, 3.16]        |            |  |
| SCT-MD-27 (B)                                                                                             | 15     | 138   | 8       | 68    | 1.4%   | 0.92                | [0.41, 2.07]        |            |  |
| SCT-MD-35                                                                                                 | 6      | 138   | 2       | 135   | 0.4%   | 2.93                | [0.60, 14.29]       |            |  |
| Sheehan et al. 2009                                                                                       | 18     | 99    | 8       | 95    | 1.5%   | 2.16                | [0.99, 4.73]        |            |  |
| Silverstone et al. 1999                                                                                   | 30     | 121   | 12      | 119   | 2.4%   | 2.48                | [1.32, 4.57]        |            |  |
| Smith et al. 1992                                                                                         | 8      | 39    | 2       | 38    | 0.4%   | 3.90                | [0.89, 17.18]       |            |  |
| Sramek et al. 1995                                                                                        | 17     | 72    | 8       | 72    | 1.5%   | 2.13                | [0.98, 4.61]        |            |  |
| Tollefson et al. 1995                                                                                     | 61     | 335   | 42      | 336   | 6.9%   | 1.46                | [1.01, 2.09]        |            |  |
| Wakelin 1986                                                                                              | 3      | 32    | 2       | 14    | 0.3%   | 0.66                | [0.12, 3.50]        |            |  |
| Walczak et al. 1996                                                                                       | 61     | 400   | 24      | 200   | 4.7%   | 1.27                | [0.82, 1.97]        |            |  |
| Wang et al 2014                                                                                           | 23     | 156   | 22      | 155   | 3.1%   | 1.04                | [0.60, 1.78]        |            |  |
| WELL AK130926                                                                                             | 12     | 149   | 14      | 137   | 1.7%   | 0.79                | [0.38, 1.64]        |            |  |
| WELL AK130927                                                                                             | 16     | 138   | 7       | 141   | 1.2%   | 2.34                | [0.98, 5.50]        |            |  |
| Total (95% CI)                                                                                            |        | 11934 |         | 7956  | 100.0% | 1.49                | [1.35, 1.64]        |            |  |
| Total events                                                                                              |        | 1500  |         | 592   |        |                     |                     |            |  |
| Heterogeneity: Tau <sup>2</sup> = 0.00; Chi <sup>2</sup> = 84.13, df = 88 (P = 0.60); I <sup>2</sup> = 0% |        |       |         |       |        |                     |                     |            |  |
| Test for overall effect: Z = 8.20 (P < 0.00001)                                                           |        |       |         |       |        |                     |                     |            |  |

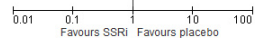

Supplement: 12888_2016_1173_MOESM16_ESM.pdf [file 12888_2016_1173_MOESM16_ESM.pdf]
