# Supplementary material for: Selective serotonin reuptake inhibitors versus placebo in patients with major depressive disorder. A systematic review with meta-analysis and Trial Sequential Analysis
Source: PubMed Central journal article supplement (PMC5299662; doi:10.1186/s12888-016-1173-2), 2017-02-08

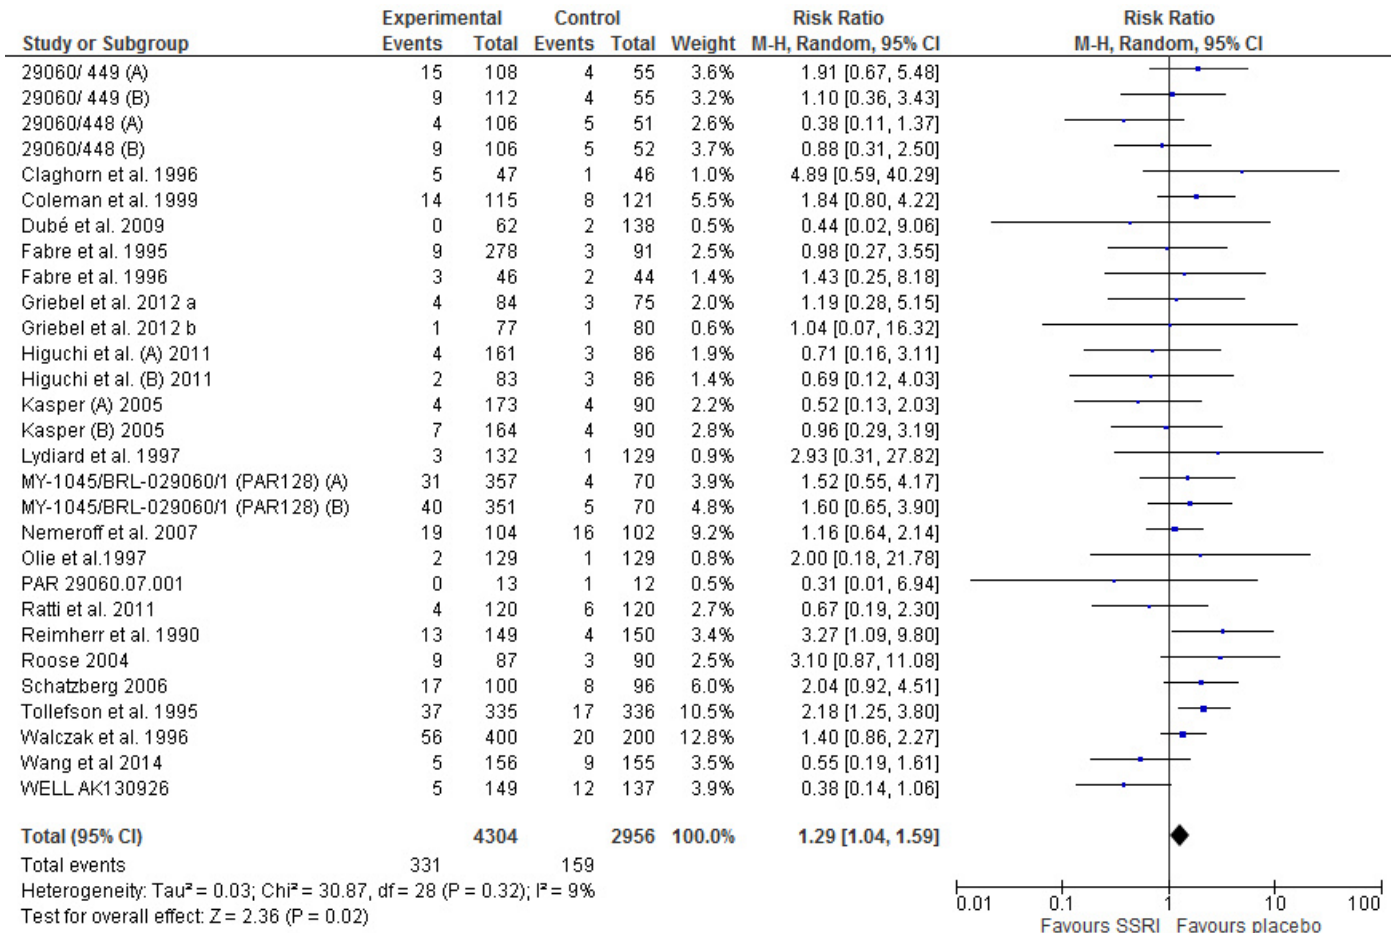

Supplement: 12888_2016_1173_MOESM29_ESM.pdf [file 12888_2016_1173_MOESM29_ESM.pdf]
