# Supplementary material for: Selective serotonin reuptake inhibitors versus placebo in patients with major depressive disorder. A systematic review with meta-analysis and Trial Sequential Analysis
Source: Springer Nature journal article supplement (doi:10.1186/s12888-016-1173-2), 2017-02-08
Supplement: MOESM6 [file 12052860]

| Event                               | SSRI                                       |                                                |                                         | Placebo                                        |                                         |                   | Relative risk<br>(95% CI) | Number<br>needed<br>to harm<br>(NNH) | P value |
|-------------------------------------|--------------------------------------------|------------------------------------------------|-----------------------------------------|------------------------------------------------|-----------------------------------------|-------------------|---------------------------|--------------------------------------|---------|
|                                     | No. of<br>trials<br>reporting<br>the event | Number of<br>participants<br>with the<br>event | Number of<br>participants<br>randomised | Number of<br>participants<br>with the<br>event | Number of<br>participants<br>randomised |                   |                           |                                      |         |
| Abnormal ejaculation                | 15                                         | 183                                            | 3236                                    | 7                                              | 1903                                    | 5.43 [3.22, 9.14] | 19                        | P < 0.00001                          |         |
| Tremor                              | 28                                         | 301                                            | 3502                                    | 61                                             | 2929                                    | 3.16 [2.37, 4.21] | 16                        | P < 0.00001                          |         |
| Anorexia                            | 19                                         | 220                                            | 2350                                    | 42                                             | 1680                                    | 2.78 [2.03, 3.79] | 15                        | P < 0.00001                          |         |
| Nausea                              | 78                                         | 2524                                           | 12257                                   | 779                                            | 8491                                    | 2.48 [2.22, 2.77] | 9                         | P < 0.00001                          |         |
| Somnolence                          | 59                                         | 1336                                           | 10351                                   | 345                                            | 6674                                    | 2.25 [2.00, 2.53] | 13                        | P < 0.00001                          |         |
| Sweating                            | 34                                         | 440                                            | 5274                                    | 124                                            | 3478                                    | 2.20 [1.80, 2.70] | 21                        | P < 0.00001                          |         |
| Asthenia                            | 23                                         | 497                                            | 3968                                    | 155                                            | 2265                                    | 1.71 [1.43, 2.04] | 18                        | P < 0.00001                          |         |
| Diarrhoea                           | 58                                         | 1458                                           | 11056                                   | 561                                            | 7099                                    | 1.66 [1.51, 1.83] | 19                        | P < 0.00001                          |         |
| Constipation                        | 50                                         | 606                                            | 6698                                    | 273                                            | 4892                                    | 1.60 [1.35, 1.89] | 29                        | P < 0.00001                          |         |
| Insomnia                            | 69                                         | 1500                                           | 11934                                   | 582                                            | 7956                                    | 1.49 [1.35, 1.64] | 19                        | P < 0.00001                          |         |
| Dizziness                           | 55                                         | 849                                            | 8900                                    | 398                                            | 6161                                    | 1.39 [1.24, 1.57] | 33                        | P < 0.00001                          |         |
| Dry mouth                           | 73                                         | 1376                                           | 11303                                   | 693                                            | 7904                                    | 1.37 [1.25, 1.49] | 30                        | P < 0.00001                          |         |
| Libido decreased                    | 8                                          | 78                                             | 1481                                    | 11                                             | 1083                                    | 3.48 [1.92, 6.32] | 24                        | P < 0.0001                           |         |
| Sexual dysfunction                  | 6                                          | 96                                             | 719                                     | 16                                             | 389                                     | 2.85 [1.77, 4.59] | 11                        | P = 0.0001                           |         |
| Appetite decreased                  | 8                                          | 68                                             | 932                                     | 24                                             | 885                                     | 2.63 [1.66, 4.17] | 22                        | P < 0.0001                           |         |
| Fatigue                             | 26                                         | 409                                            | 5098                                    | 153                                            | 3545                                    | 1.69 [1.32, 2.17] | 27                        | P < 0.0001                           |         |
| Vomiting or upset stomach           | 20                                         | 189                                            | 2376                                    | 101                                            | 2037                                    | 1.55 [1.16, 2.08] | 34                        | P = 0.003                            |         |
| Flu syndrome                        | 7                                          | 57                                             | 1069                                    | 19                                             | 822                                     | 2.13 [1.28, 3.54] | 34                        | P = 0.004                            |         |
| Drowsiness                          | 5                                          | 38                                             | 253                                     | 19                                             | 256                                     | 1.90 [1.18, 3.04] | 14                        | P = 0.004                            |         |
| Blurred/abnormal vision or dry eyes | 17                                         | 116                                            | 1862                                    | 55                                             | 1566                                    | 1.55 [1.15, 2.10] | 37                        | P = 0.004                            |         |
| Nervousness                         | 22                                         | 484                                            | 3863                                    | 147                                            | 2043                                    | 1.35 [1.10, 1.66] | 19                        | P = 0.004                            |         |
| Back pain                           | 11                                         | 85                                             | 2404                                    | 71                                             | 1594                                    | 0.66 [0.48, 0.91] | 109                       | P = 0.01                             |         |
| Headache                            | 72                                         | 2386                                           | 11085                                   | 1427                                           | 7805                                    | 1.08 [1.01, 1.14] | 31                        | P = 0.02                             |         |
| Dyspepsia                           | 23                                         | 331                                            | 4304                                    | 159                                            | 2956                                    | 1.29 [1.04, 1.59] | 44                        | P = 0.02                             |         |
| Weight loss                         | 3                                          | 26                                             | 562                                     | 9                                              | 560                                     | 2.48 [1.17, 5.25] | 34                        | P = 0.02                             |         |
