# Supplementary material for: Selective serotonin reuptake inhibitors versus placebo in patients with major depressive disorder. A systematic review with meta-analysis and Trial Sequential Analysis
Source: Springer Nature journal article supplement (doi:10.1186/s12888-016-1173-2), 2017-02-08

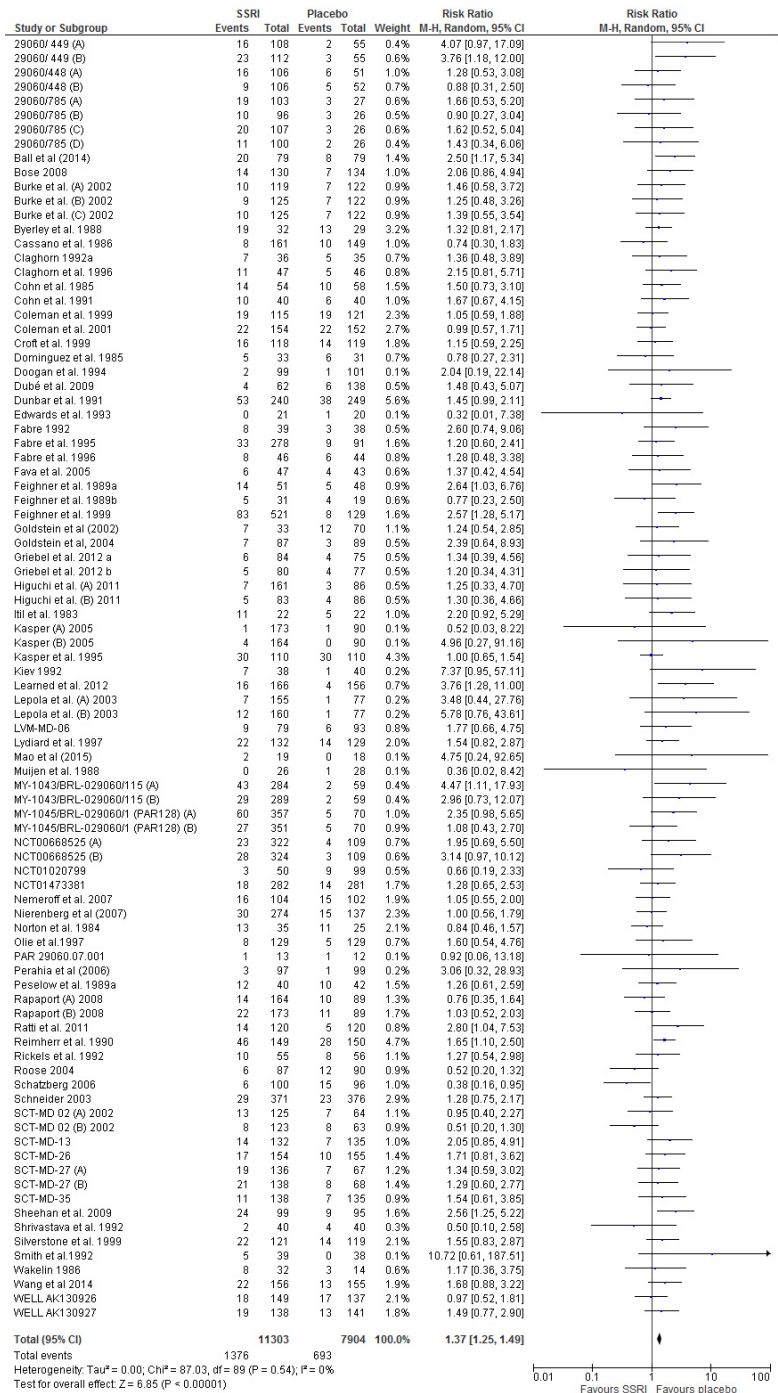

Supplement: MOESM18 [file 12052860]
