# Supplementary material for: Selective serotonin reuptake inhibitors versus placebo in patients with major depressive disorder. A systematic review with meta-analysis and Trial Sequential Analysis
Source: BMC Psychiatry. 2017 Feb 8;17:58. doi: 10.1186/s12888-016-1173-2 (PMC5299662; doi:10.1186/s12888-016-1173-2)
Supplement: Supplementary file 3 — Trial characteristics. (XLS 80 kb) [file 12888_2016_1173_MOESM3_ESM.xls]

## Sheet: Included studies
Author	Type of record	Experimental intervention	Dose range (mg/day)	Control intervention	Length of intervention period (weeks)	Randomised to SSRI	Randomised to control	Baseline mean HDRS-17 score		Co-interventions	Other characteristics of participants besides adult depressed
								SSRI	Control
Agosti et al, 2002	Secondary publication to McGrath et al, 2000	Fluoxetine	20-60	Placebo	10	49	52	Not mentioned	Not mentioned	None	None
Andreoli et al, 2002	Secondary publication to Dubini et al, 1997a	Fluoxetine	20-40	Placebo	8	127	128	26.9	27.4	None	None
Balaratnasingam et al, 2011	Secondary publication to Pettinati et al, 2010	Sertraline	50-200	Placebo	14	40	39	Not mentioned	Not mentioned	None	Alcohol dependent
Barber et al, 2012	Primary publication	Sertraline	50-200	Placebo	8	55	50	19	19.3	None	Dysthymic
Beasley et al, 1991	Secondary publication to Cohn et al, 1985	Fluoxetine	20-80	Placebo	6	54	58	Not mentioned	Not mentioned	None	None
Binneman et al, 2008	Primary publication	Sertraline	50-100	Placebo	6	43	39	23.3	23.55	None	None
Bitran(A ) et al, 2011	Secondary publication to Davidson et al, 2002	Sertraline	50-100	Placebo	8	111	116	Not mentioned	Not mentioned	None	None
Bitran(B ) et al, 2011	Secondary publication to Fava et al, 2005	Fluoxetine	20	Placebo	8	47	43	Not mentioned	Not mentioned	None	None
Blumenthal et al, 2007	Primary publication	Sertraline	50-200	Placebo	16	49	49	16	17	None	None
Bose et al, 2008	Primary publication	Escitalopram	10 -20	Placebo	12	132	135	20.3	19.6	None	Elderly
Brunoni et al (A), 2013a	Primary publication	Sertraline	50	Placebo	6	30	30	22	22	Active tDCS	None
Brunoni et al (B), 2013a	Primary publication	Sertraline	50	Placebo	6	30	30	22	22	Sham tDCS	None
Brunoni et al (A), 2014	Secondary publication to Brunoni et al 2013a	Sertraline	50	Placebo	6	30	30	22	22	Active tDCS	None
Brunoni et al (B), 2014	Secondary publication to Brunoni et al 2013a	Sertraline	50	Placebo	6	30	30	22	22	Sham tDCS	None
Brunoni (A), 2013b	Secondary publication to Brunoni et al 2013a	Sertraline	50	Placebo	6	30	30	Not mentioned	Not mentioned	Active tDCS	None
Brunoni (B), 2013b	Secondary publication to Brunoni et al 2013a	Sertraline	50	Placebo	6	30	30	Not mentioned	Not mentioned	Sham tDCS	None
Burke et al (A), 2002	Primary publication	Escitalopram	10	Placebo	8	118	40	24.3	25.8	None	None
Burke et al (B), 2002	Primary publication	Escitalopram	20	Placebo	8	123	40	25.8	25.8	None	None
Burke et al (C), 2002	Primary publication	Citalopram	40	Placebo	8	125	39	25.9	25.8	None	None
Byerley et al, 1988	Primary publication	Fluoxetine	20-80	Placebo	6	32	29	27.2	27.3	None	None
Cassano et al, 1986	Primary publication	Fluvoxamine	50-300	Placebo	4	161	149	25.61	25.6	None	None
Chen et al, 2011a	Primary publication	Escitalopram	10	Placebo	8	29	26	Not mentioned	Not mentioned	None	Elderly
Chen et al, 2011b	Secondary publication to Davidson et al, 2002	Sertraline	50 - 150	Placebo	8	111	116	Not mentioned	Not mentioned	None	None
Claghorn et al, 1996	Primary publication	Fluvoxamine	25 -150	Placebo	6	50	50	26.09	26.42	None	None
Claghorn et al, 1992a	Primary publication	Paroxetine	10-50	Placebo	6	36	36	25	24.6	None	None
Claghorn et al, 1992b	Secondary publication to Claghorn et al, 1992a	Paroxetine	10-50	Placebo	6	36	36	Not mentioned	Not mentioned	None	None
Claghorn et al, 1992c	Secondary publication to Claghorn et al, 1992a	Paroxetine	10-50	Placebo	6	36	36	Not mentioned	Not mentioned	None	None
Clayton et al, 2007	Secondary publication to Nierenberg et al, 2007	Escitalopram	10-20	Placebo	32	274	137	17.8	17.7	None	None
Clayton et al, 2006	Primary publication	Escitalopram	13	Placebo	8	281	273	23.3	23.3	None	None
Cohn et al, 1992	Secondary publication toCohn et al, 1990	Paroxetine	10-50	Placebo	6	40	40	24.9	25.6	None	None
Cohn et al, 1985	Primary publication	Fluoxetine	20-80	Placebo	6	54	58	27.75	25.14	None	None
Cohn et al, 1990	Primary publication	Paroxetine	10-50	Placebo	6	40	40	24.9	25.6	None	None
Coleman et al, 2001	Primary publication	Fluoxetine	20 -60	Placebo	8	154	152	24.5	24.4	None	None
Coleman et al, 1999	Primary publication	Sertraline	50-200	Placebo	8	118	124	34.8	34	None	None
Combs et al, 2014	Secondary publication to Blumenthal et al, 2007	Sertraline	50-200	Placebo	16	49	49	Not mentioned	Not mentioned	None	None
Conti et al, 1989	Secondary publication to Cassano et al, 1986	Fluvoxamine	50-300	Placebo	4	161	149	Not mentioned	Not mentioned	None	None
Conti et al, 1988	Secondary publication to Cassano et al, 1986	Fluvoxamine	50-300	Placebo	4	161	149	Not mentioned	Not mentioned	None	None
Cornelius et al, 1998	Secondary publication to Cornelius 1997b	Fluoxetine	20-40	Placebo	12	25	26	Not mentioned	Not mentioned	None	None
Cornelius et al, 1995	Secondary publication to Cornelius 1997b	Fluoxetine	20-40	Placebo	12	25	26	Not mentioned	Not mentioned	None	None
Cornelius et al, 1997a	Secondary publication to Cornelius 1997b	Fluoxetine	20-40	Placebo	12	25	26	Not mentioned	Not mentioned	None	None
Cornelius et al, 1999	Secondary publication to Cornelius 1997b	Fluoxetine	20-40	Placebo	12	25	26	Not mentioned	Not mentioned	None	None
Cornelius et al, 1998	Secondary publication to Cornelius 1997b	Fluoxetine	20-40	Placebo	12	25	26	Not mentioned	Not mentioned	None	None
Cornelius et al, 1997b	Primary publication	Fluoxetine	20-40	Placebo	12	25	26	Not mentioned	Not mentioned	Psychotherapy, usual care	Alcohol dependent
Corrigan et al, 2000	Primary publication	Fluoxetine	20	Placebo	8	35	35	22	20.8	None	None
Croft et al, 1999	Primary publication	Sertraline	50-200	Placebo	8	119	121	Not mentioned	Not mentioned	None	None
Davidson et al, 2002	Primary publication	Sertraline	50 - 150	Placebo	8	111	116	22.5	22.7	None	None
DeRubeis et al, 2005	Primary publication	Paroxetine	10-50	Placebo	8	120	60	23.4	23.4	None	None
Detke et al, 2004	Primary publication	Paroxetine	20	Placebo	8	86	93	20.3	19.9	None	None
Dinger et al, 2013	Secondary publication to Barber et al, 2012	Sertraline	50-200	Placebo	8	54	50	Not mentioned	Not mentioned	None	None
Dominguez et al, 1985	Primary publication	Fluvoxamine	50-300	Placebo	4	35	31	20.4	20.9	None	None
Doogan et al, 1994	Primary publication	Sertraline	50-100	Placebo	6	99	101	Not mentioned	Not mentioned	None	None
Dubé et al, 2010	Primary publication	Escitalopram	10-20	Placebo	8	62	138	Participants were categorised in to mild, moderate and severe and overall mean was not mentioned	Participants were categorised in to mild, moderate and severe and overall mean was not mentioned	None	None
Dubini et al, 1997a	Primary publication	Fluoxetine	20 - 40	Placebo	8	127	128	Not mentioned	Not mentioned	None	None
Dubini et al, 1997b	Secondary publication to Dubini et al, 1997a	Fluoxetine	20 - 40	Placebo	8	127	128	Not mentioned	Not mentioned	None	None
Dunbar et al, 1991	Primary publication	Paroxetine	10 - 50	Placebo	6	241	244	26.5	26.6	None	None
Durham et al, 2004	Secondary publication to Schneider et al, 2003	Sertraline	50 -100	Placebo	8	376	376	Not mentioned	Not mentioned	None	None
Edwards et al, 1993	Primary publication	Paroxetine	20-30	Placebo	6	21	20	24.5	22.5	None	None
Edwards et al, 1989	Secondary publication to Edwards et al, 1993	Paroxetine	20-30	Placebo	6	21	20	Not mentioned	Not mentioned	None	None
Fabre et al, 1985	Primary publication	Fluoxetine	40-80	Placebo	5	22	26	28.88	27.4	None	None
Fabre et al, 1995	Primary publication	Sertraline	50-200	Placebo	6	278	91	25.1	25.3	None	None
Fabre et al, 1987	Primary publication	Fluoxetine	20-60	Placebo	6	72	12	27.42	25.5	None	None
Fabre, 1992	Primary publication	Paroxetine	10-50	Placebo	6	40	40	29.7	28.8	None	None
Fabre et al, 2012	Primary publication	Fluoxetine	20-40	Placebo	8	90	91	Not mentioned	Not mentioned	None	None
Fabre et al, 1996	Primary publication	Fluvoxamine	25-150	Placebo	6	50	50	22.7	26	None	None
Fava et al, 2005	Primary publication	Fluoxetine	20	Placebo	12	47	43	19.6	19.9	None	None
Fava et al (A), 1998	Primary publication	Paroxetine	20-50	Placebo	12	55	9	23.1	23.7	None	None
Fava et al (B), 1998	Primary publication	Fluoxetine	20-80	Placebo	12	54	10	23.9	23.7	None	None
Feighner et al, 1993	Secondary publication to Dunbar et al, 1991	Paroxetine	10-50	Placebo	6	241	244	26.4	26.6	None	None
Feighner et al, 1989a	Primary publication	Fluoxetine	Maxium dose 80	Placebo	6	61	59	25.6	25.9	None	None
Feighner et al, 1989b	Primary publication	Fluvoxamine	85-280	Placebo	6	31	19	25	25	None	None
Feighner et al, 1989c	Primary publication	Paroxetine	Maxium dose 50	Placebo	6	39	37	Not mentioned	Not mentioned	None	None
Feighner, 1999	Primary publication	Citalopram	10-60	Placebo	6	521	129	24.6	24.6	None	None
Fournier et al, 2013	Secondary publication to DeRubeis et al, 2005	Paroxetine	10-50	Placebo	8	120	60	Not mentioned	Not mentioned	None	None
Godlewska et al, 2012	Primary publication	Escitalopram	10	Placebo	1	21	21	24.2	23.3	None	None
Goldstein et al, 1997	Secondary publication to Tollefson et al, 1995	Fluoxetine	20	Placebo	6	335	336	Not mentioned	Not mentioned	None	None
Griebel et al (A), 2012	Primary publication	Escitalopram	10	Placebo	8	84	75	23.4	23	None	None
Griebel et al (B), 2012	Primary publication	Paroxetine	20	Placebo	8	77	73	24.9	24.8	None	None
Gueorguieva et al (A), 2011	Secondary publication to Goldstein et al, 2002, 2004, Detke et al, 2004 and Perahia et al 2006	Fluoxetine	20	Placebo	8	70	144	Not mentioned	Not mentioned	None	None
Gueorguieva et al (B), 2011	Secondary publication to Goldstein et al, 2002, 2004, Detke et al, 2004 and Perahia et al 2006	Paroxetine	20	Placebo	8	176	179	Not mentioned	Not mentioned	None	None
Gueorguieva et al (C), 2011	Secondary publication to Goldstein et al, 2002, 2004, Detke et al, 2004 and Perahia et al 2006	Paroxetine	20	Placebo	8	183	192	Not mentioned	Not mentioned	None	None
Gueorguieva et al (D), 2011	Secondary publication to Goldstein et al, 2002, 2004, Detke et al, 2004 and Perahia et al 2006	Escitalopram	10	Placebo	8	273	137	Not mentioned	Not mentioned	None	None
Heiligenstein et al, 1995	Secondary publication to Tollefson et al, 1995	Fluoxetine	20	Placebo	8	335	336	Not mentioned	Not mentioned	None	None
Higuchi et al (A), 2011	Primary publication	Paroxetine controlled-release	12.5-50	Placebo	8	161	86	22.7	22.6	None	None
Higuchi et al (B), 2011	Primary publication	Paroxetine immediate-release	10-40	Placebo	8	83	86	22.7	22.6	None	None
Hoffman et al, 2008	Secondary publication to Blumenthal et al, 2007	Sertraline	50-200	Placebo	16	49	49	16.1	17.2	None	None
Hunter et al, 2011	Primary publication	Fluoxetine	20	Placebo	8	13	11	23.17	20.73	None	None
Hunter et al, 2010	Primary publication	Fluoxetine	20	Placebo	8	14	14	Not mentioned	Not mentioned	None	None
Hunter et al, 2012	Secondary publication to Hunter et al, 2010	Fluoxetine	20	Placebo	8	14	14	Not mentioned	Not mentioned	None	Noen
Itil et al, 1983	Primary publication	Fluvoxamine	50-300	Placebo	4	22	22	20.3	19.7	None	None
Jindal et al, 2003	Primary publication	Sertraline	50	Placebo	12	30	29	22	20.7	None	None
Johnson et al, 1993	Secondary publication to Lydiard et al, 1989	Fluvoxamine	100-300	Placebo	6	18	18	Not mentioned	Not mentioned	None	None
Kaddurah-Daouk et al, 2011	Primary publication	Sertraline	50-150	Placebo	4	45	46	24.8	24.8	None	None
Kaddurah-Daouk et al, 2013	Secondary publication to Kaddurah-Daouk et al, 2011	Sertraline	50-150	Placebo	4	45	46	24.8	24.8	None	None
Kasper et al, 1995	Secondary publication to Amin et al, 1984	Fluvoxamine	50 - 300	Placebo	4	116	109	23.2	23.2	None	None
Kasper et al, 2011	Primary publication	Escitalopram	10-20	Placebo	8	140	71	Not mentioned	Not mentioned	None	None
Kasper et al (A), 2005	Primary publication	Escitalopram	10	Placebo	8	173	90	Not mentioned	Not mentioned	None	Elderly
Kasper et al (B), 2005	Primary publication	Fluoxetine	20	Placebo	8	164	90	Not mentioned	Not mentioned	None	Elderly
Katz et al, 2004	Primary publication	Paroxetine	20-60	Placebo	2	28	25	24	25.9	None	None
Kennedy et al (A), 2010	Primary publication	Fluoxetine	80	Placebo	6	Not clear	Not clear	Not mentioned	Not mentioned	None	None
Kennedy et al (B), 2010	Primary publication	Fluoxetine	80	Placebo	6	Not clear	Not clear	Not mentioned	Not mentioned	None	None
Kennedy et al (C), 2010	Primary publication	Paroxetine	80	Placebo	8	Not clear	Not clear	Not mentioned	Not mentioned	None	None
Kennedy et al (D), 2010	Primary publication	Paroxetine	80	Placebo	8	Not clear	Not clear	Not mentioned	Not mentioned	None	None
Kiev et al, 1992	Primary publication	Paroxetine	10-50	Placebo	6	Not clear	Not clear	28.8	27.5	None	None
Koran et al, 1995	Secondary publication to Tollefson et al, 1995	Fluoxetine	20	Placebo	.	335	336	Not mentioned	Not mentioned	None	None
Korb et al, 2011	Secondary publication to Korb et al, 2009	Fluoxetine	20	Placebo	8	13	35	21.8	21.9	None	None
Kranzler et al (A), 2006	Primary publication	Sertraline	50-200	Placebo	10	89	100	20.3	20.9	Supportive therapy	Alcohol dependent
Kranzler et al (B), 2006	Primary publication	Sertraline	50-200	Placebo	10	70	69	12.6	12.5	Supportive therapy	Alcohol dependent
Learned et al, 2012	Primary publication	Paroxetine	20-30	Placebo	10	166	156	Not mentioned	Not mentioned	None	None
Lepola et al (A), 2003	Primary publication	Escitalopram	10-20	Placebo	8	155	77	Not mentioned	Not mentioned	None	None
Lepola et al (B), 2003	Primary publication	Citalopram	20-40	Placebo	8	160	77	Not mentioned	Not mentioned	None	None
Leuchter et al, 2004	Primary publication	Fluoxetine	20	Placebo	8	24	26	Not mentioned	Not mentioned	None	None
Lydiard et al, 1989	Primary publication	Fluvoxamine	100-300	Placebo	6	18	18	26	24.5	None	None
Lydiard et al, 1997	Primary publication	Sertraline	50-200	Placebo	8	132	129	21.5	22.1	None	None
Mancino et al, 2014	Primary publication	Sertraline	50-200	Placebo	12	35	38	Not mentioned	Not mentioned	None	Cocaine dependent
Mao et al, 2014	Abstract	Sertraline	50-200	Placebo	12	Not mentioned	Not mentioned	Not mentioned	Not mentioned	None	None
March et al, 1990	Primary publication	Fluvoxamine	50-300	Placebo	8	13	12	27	25	None	None
Mayberg et al, 2002	Primary publication	Fluoxetine	20	Placebo	6	8	9	22	23	None	None
McGrath et al, 2000	Primary publication	Fluoxetine	20-60	Placebo	10	49	52	Not mentioned	Not mentioned	None	None
Miller et al, 1989	Primary publication	Paroxetine	30	Placebo	4	22	25	22.7	24.4	None	None
Mischoulon et al, 2014	Primary publication	Escitalopram	10-20	Placebo	12	65	60	19.25	19.43	None	None
Muijen et al, 1988	Primary publication	Fluoxetine	40-80	Placebo	6	26	28	26	25.7	None	None
Nemeroff et al, 2007	Primary publication	Fluoxetine	20-60	Placebo	6	104	102	23.7	23.7	None	None
Norton et al, 1984	Primary publication	Fluvoxamine	Started with 50 and adjusted later (mean:132.8)	Placebo	4	33	25	19.5	19.9	None	None
O'Flynn et al, 1991	Primary publication	Fluoxetine	20	Placebo	4	6	6	21.3	20.8	None	None
Olie et al, 1997	Primary publication	Sertraline	50-200	Placebo	6	129	129	25.4	25.5	None	None
Peselow et al, 1986	Primary publication	Sertraline	50-400	Placebo	4	Not clear	Not clear	Not mentioned	Not mentioned	None	None
Peselow et al, 1989a	Primary publication	Paroxetine	20-50	Placebo	6	40	42	Not mentioned	Not mentioned	None	None
Peselow et al, 1989b	Secondary publication to Peselow et al, 1989a	Paroxetine	20-50	Placebo	6	40	42	Not mentioned	Not mentioned	None	None
Petrakis et al, 1998	Primary publication	Fluoxetine	20-60	Placebo	12	16	18	13.9	15	None	Opioid dependent
Pettinati et al, 2010	Primary publication	Sertraline	50-200	Placebo	14	40	39	Not mentioned	Not mentioned	Cognetive-behavioral therapy	Alcohol dependent
Porro et al, 1988	Primary publication	Fluvoxamine	100-500	Placebo	4	21	20	25.33	25.15	None	None
Rapaport et al (A), 2003	Primary publication	Paroxetine, CR	12.5-50	Placebo	12	106	55	22.1	22.1	None	Elderly
Rapaport et al (A), 2009	Primary publication	Paroxetine	12.5	Placebo	10	168	90	22.56	22.73	None	Elderly
Rapaport et al (B), 2003	Primary publication	Paroxetine, IR	10-40	Placebo	12	108	54	22.3	22.1	None	Elderly
Rapaport et al (B), 2009	Primary publication	Paroxetine	12.5 - 25	Placebo	10	177	90	23.1	22.73	None	Elderly
Ratti et al, 2011	Primary publication	Paroxetine	20-30	Placebo	8	113	123	22.8	22.5	None	None
Ravindran et al, 1995	Primary publication	Sertraline	50-200	Placebo	8	40	26	20.7	21	None	None
Reimherr et al, 1990	Primary publication	Sertraline	50-200	Placebo	8	149	150	23.29	23.25	None	None
Reynolds et al, 2005	Primary publication	Paroxetine	10 - 20	Placebo	2	27	27	21	20.8	Total Sleep Deprivation	Elderly
Rickels et al, 1986	Primary publication	Fluoxetine	20-80	Placebo	5	18	24	25.2	25.8	None	None
Rickels et al, 1989	Secondary publication to Rickels et al, 1992	Paroxetine	10-50	Placebo	6	55	56	26.8	25.9	None	None
Rickles et al, 1992	Primary publication	Paroxetine	10-50	Placebo	6	55	56	26.8	25.9	None	None
Roose et al, 2004	Primary publication	Citalopram	10 - 40	Placebo	8	87	91	Not mentioned	Not mentioned	None	Elderly
Roth et al, 1990	Primary publication	Fluvoxamine	100-300	Placebo	6	30	30	28.3	28.9	None	None
Roy et al, 1998	Primary publication	Sertraline	100	Placebo	6	18	18	25.5	20.2	None	Alcohol dependent
Rudolph et al, 1999	Primary publication	Fluoxetine	20-60	Placebo	8	103	98	26	25	None	None
Sarris et al, 2014	Secondary publication to Mischoulon et al, 2014	Escitalopram	10	Placebo	12	65	60	20.83	20.63	None	None
Schatzberg et al, 2006	Primary publication	Fluoxetine	20 -60	Placebo	8	99	96	24	23	None	Elderly
Schmitz et al, 2001	Primary publication	Fluoxetine	40	Placebo	12	34	34	27.8	30.1	Cognetive-behavioral therapy	Cocaine dependent
Schneider et al, 2003	Primary publication	Sertraline	50 -100	Placebo	8	376	376	21.4	21.2	None	Elderly
SCT-MD 01 (A), 2002	Unpublished results of Burke et al, 2002	Escitalopram	10	Placebo	8	118	40	24.3	25.8	None	None
SCT-MD 01 (B), 2002	Unpublished results of Burke et al, 2002	Escitalopram	20	Placebo	8	123	40	25.8	25.8	None	None
SCT-MD 01 (C), 2002	Unpublished results of Burke et al, 2002	Citalopram	40	Placebo	8	125	39	25.9	25.8	None	None
SCT-MD 02 (A), 2002	Unpublished lead trial	Escitalopram	10-20	Placebo	8	124	63	25	24.8	None	None
SCT-MD 02 (B), 2002	Unpublished lead trial	Citalopram	20-40	Placebo	8	119	62	25	25	None	None
Sheehan et al, 2009	Primary publication	Fluoxetine	20-80	Placebo	6	99	95	29.5	29.4	None	None
Shrivastava et al, 1992	Primary publication	Paroxetine	10-50	Placebo	6	40	40	27.6	26.7	None	None
Silverstone et al, 1999	Primary publication	Fluoxetine	20-60	Placebo	12	121	119	27	27.1	None	Anxiety
Small et al, 1996	Secondary publication to Tollefson et al, 1995	Fluoxetine	20	Placebo	6	335	336	22.2	22.1	None	None
Small et al, 1995	Secondary publication to Tollefson et al, 1995	Fluoxetine	20	Placebo	6	335	336	22.2	22.1	None	None
Smith et al, 1992	Primary publication	Paroxetine	10-50	Placebo	6	39	38	28.6	28.9	None	None
Sneed et al, 2010	Secondary publication to Roose et al, 2004	Citalopram	10 -40	Placebo	8	87	91	Not mentioned	Not mentioned	None	None
Sramek et al, 1995	Primary publication	Fluoxetine	20	Placebo	9	72	72	28.2	27.5	None	None
Stahl et al (A), 2000	Primary publication	Sertraline	50-150	Placebo	24	106	53	26.6	26.4	None	None
Stahl et al (B), 2000	Primary publication	Citalopram	20-60	Placebo	24	103	54	26.5	26.4	None	None
Strunk et al, 2010	Secondary publication to DeRubeis et al, 2005	Paroxetine	10-50	Placebo	8	80	40	22.6	23.1	Clinical management	None
Tang et al, 2009	Secondary publication to DeRubeis et al, 2005	Paroxetine	10 - 20	Placebo	8	120	60	22.7	23.2	None	None
Taylor et al, 2012	Secondary publication to Godlewska et al, 2012	Escitalopram	10	Placebo	1	20	19	24.2	23.2	None	None
Tollefson et al, 1993	Secondary publication to Tollefson et al, 1995	Fluoxetine	20	Placebo	6	335	336	24	23.7	None	None
Tollefson et al, 1995	Primary publication	Fluoxetine	20	Placebo	6	335	336	22.2	22.1	None	Elderly
Trivedi et al (A), 2004	Primary publication	Paroxetine	12.5	Placebo	8	156	75	23.2	23.8	None	None
Trivedi et al (B), 2004	Primary publication	Paroxetine	25	Placebo	8	154	74	23.5	23.8	None	None
Tyrer et al, 1987	Primary publication	Paroxetine	30-40	Placebo	2	19	18	20	21.5	None	None
Vitiello et al, 2005	Secondary publication to Davidson et al, 2002	Sertraline	50-100	Placebo	8	111	116	22.5	22.7	None	None
Wade et al, 2002	Primary publication	Escitalopram	10	Placebo	8	191	189	Not mentioned	Not mentioned	None	None
Wakelin et al, 1986	Secondary publication to Amin, 1984, Wagner 1985, Itil 1983, Block & Coleman, 1983	Fluvoxamine	150-300	Placebo	4	33	14	24.7	25.4	None	Elderly
Walczak et al, 1996	Primary publication	Fluvoxamine	25-150	Placebo	6	400	200	Not mentioned	Not mentioned	None	None
Wang et al, 2014	Primary publication	Escitalopram	10-20	Placebo	8	157	157	27.2	26.6	None	None
Zhu et al, 2013	Secondary publication to Kaddurah-Daouk et al, 2011	Sertraline	50-150	Placebo	4	35	40	24.8	24.8	None	None
Zilcha-Mano et al, 2014	Secondary publication to Barber et al, 2012	Sertraline	50-200	Placebo	16	55	50	19	19.3	None	Anxiety
Zitman et al, 2001	Primary publication	Paroxetine	20	Placebo	6	70	129	17.2	17.4	Diazepam/Benzodiazepine	Anxiety
PAR 09 (A), 1992	Unpublished lead trial	Paroxetine	10	Placebo	6	100	13	Not mentioned	Not mentioned	None	None
PAR 09 (B), 1992	Unpublished lead trial	Paroxetine	20	Placebo	6	104	13	Not mentioned	Not mentioned	None	None
PAR 09 (C), 1992	Unpublished lead trial	Paroxetine	30	Placebo	6	99	12	Not mentioned	Not mentioned	None	None
PAR 09 (D), 1992	Unpublished lead trial	Paroxetine	40	Placebo	6	100	13	Not mentioned	Not mentioned	None	None
PAR 01-001, 1992	Unpublished lead trial	Paroxetine	10-50	Placebo	6	24	24	Not mentioned	Not mentioned	None	None
89303 (A), 1998	Unpublished results of Montgomery et al, 1992	Citalopram	20	Placebo	6	70	33	24.29	23.72	None	None
89303 (B), 1998	Unpublished results of Montgomery et al, 1992	Citalopram	40	Placebo	6	64	33	22.98	23.72	None	None
89306 (A), 1998	Unpublished lead trial	Citalopram	20	Placebo	6	88	44	Not mentioned	Not mentioned	None	None
89306 (B), 1998	Unpublished lead trial	Citalopram	20-40	Placebo	6	97	45	Not mentioned	Not mentioned	None	None
29060/785 (A), 2005	Unpublished lead trial	Paroxetine CR 25 mg	12.5-25	Placebo	6	103	27	Not mentioned	Not mentioned	None	None
29060/785 (B), 2005	Unpublished lead trial	Paroxetine CR 12.5 mg	12.5	Placebo	6	96	26	Not mentioned	Not mentioned	None	None
29060/785 (C), 2005	Unpublished lead trial	Citalopram 20mg	10 -20	Placebo	6	107	26	Not mentioned	Not mentioned	None	None
29060/785 (D), 2005	Unpublished lead trial	Citalopram 40mg	10 -40	Placebo	6	100	26	Not mentioned	Not mentioned	None	None
SCT-MD-27 (A), 2005	Unpublished lead trial	Escitalopram	10 -20	Placebo	8	136	67	26.47	27.29	None	None
SCT-MD-27 (B), 2005	Unpublished lead trial	Sertraline	50-200	Placebo	8	138	68	26.15	27.29	None	None
SCT-MD-13, 2005	Unpublished results of Bose et al, 2008	Escitalopram	10-20	Placebo	12	132	135	24.9	24.3	None	Elderly
SCT-MD-35, 2007	Unpublished lead trial	Escitalopram	4	Placebo	8	138	135	Not mentioned	Not mentioned	None	None
SCT-MD-26, 2005	Unpublished lead trial	Escitalopram	10-20	Placebo	8	154	155	Not mentioned	Not mentioned	None	None
MY-1043/BRL-029060/115 (A), 2005	Unpublished lead trial	Paroxetine	20-50	Placebo	12	284	59	Not mentioned	Not mentioned	None	None
MY-1043/BRL-029060/115 (B), 2005	Unpublished lead trial	Fluoxetine	20-80	Placebo	12	289	59	Not mentioned	Not mentioned	None	None
MY-1045/BRL-029060/1 (PAR128) (A), 2005	Unpublished lead trial	Paroxetine	20-50	Placebo	12	357	70	25.6	25.7	None	None
MY-1045/BRL-029060/1 (PAR128) (B), 2005	Unpublished lead trial	Fluoxetine	20-80	Placebo	12	351	70	25.6	25.7	None	None
LVM-MD-06, 2013	Unpublished lead trial	SSRI	Fluoxetine and paroxetine: 20-60, Sertraline:50-150	Placebo	8	79	93	Not mentioned	Not mentioned	None	None
29060/ 449 (A), 2005	Unpublished results of Golden et al, 2002	Paroxetine CR	20-50	Placebo	12	108	55	23.8	23.5	None	None
29060/ 449 (B), 2005	Unpublished results of Golden et al, 2002	Paroxetine IR	25-62.5	Placebo	12	112	55	23.7	23.5	None	None
29060/448 (A), 2005	Unpublished results of Golden et al, 2002	Paroxetine CR	20-50	Placebo	12	106	52	23.0	23.4	None	None
29060/448 (B), 2005	Unpublished results of Golden et al, 2002	Paroxetine IR	25-62.5	Placebo	12	106	51	23.3	23.4	None	None
PAR 29060.07.001, 2005	Unpublished lead trial	Paroxetine	10-60	Placebo	6	13	12	30.5	28.3	None	None
SND103288, 2008	Unpublished results of Learned et al, 2012	Paroxetine	20-30	Placebo	10	172	160	Not mentioned	Not mentioned	None	None
Dunlop et al (A), 1990	Primary publication	Fluoxetine	20	Placebo	6	107	19	Not mentioned	Not mentioned	None	None
Dunlop et al (B), 1990	Primary publication	Fluoxetine	40	Placebo	6	105	19	Not mentioned	Not mentioned	None	None
Dunlop et al (C), 1990	Primary publication	Fluoxetine	60	Placebo	6	104	18	Not mentioned	Not mentioned	None	None
Perahia et al, 2006	Primary publication	Paroxetine	20	Placebo	8	97	99	21	20.6	None	None
Goldstein et al, 2002	Primary publication	Fluoxetine	80	Placebo	8	33	70	17.9	19.2	None	None
Goldstein et al, 2004	Primary publication	Paroxetine	20	Placebo	8	87	89	17.83	17.2	None	None
Montgomery et al (A), 1992	Primary publication	Citalopram	40	Placebo	6	64	32	Not mentioned	Not mentioned	None	None
Montgomery et al (B), 1992	Primary publication	Citalopram	20	Placebo	6	70	33	Not mentioned	Not mentioned	None	None
Nierenberg et al, 2007	Primary publication	Escitalopram	10	Placebo	8	274	137	17.8	17.7	None	None
WELL AK130926, 2007	Unpublished results of Clayton et al, 2006	Escitalopram	10-20	Placebo	8	149	137	Not mentioned	Not mentioned	None	None
WELL AK130927, 2007	Unpublished results of Clayton et al, 2006	Escitalopram	10-20	Placebo	8	138	141	23.8	24.4	None	None
NCT00668525 (A), 2010	Unpublished lead trial	Escitalopram low dose	Not mentioned	Placebo	8	322	109	Not mentioned	Not mentioned	None	None
NCT00668525 (B), 2010	Unpublished lead trial	Escitalopram high dose	Not mentioned	Placebo	8	324	109	Not mentioned	Not mentioned	None	None
NCT01020799, 2012	Unpublished lead trial	Escitalopram	20	Placebo	4	50	99	24.4	24.6	None	None
NKF100096, 2007	Unpublished lead trial Ratti et al, 2011	Paroxetine	20-30	Placebo	8	113	123	22.8	22.5	None	None
Adamson et al, 2015	Primary publication	Citalopram	20-60	Placebo	12	73	65	Not mentioned	Not mentioned	Naltrexone, manualised clinical case management	Alcohol dependent
Mathews et al, 2014	Primary publication	Citalopram	20-40	Placebo	10	282	281	Not mentioned	Not mentioned	None	None
Ball et al, 2014	Primary publication	Paroxetine	20	Placebo	6	78	79	24.2	24.7	Aprepitant	None
Mao et al, 2015	Primary publication	Sertraline	50	Placebo	12	19	18	15.4	14.4	None	None
Golden et al (A), 2002	Primary publication	Paroxetine CR	25-62.5	Placebo	12	212	106	Not mentioned	Not mentioned	None	None
Golden et al (B), 2002	Primary publication	Paroxetine IR	20-50	Placebo	12	217	105	Not mentioned	Not mentioned	None	None
99001, 2005	Unpublished results of Wade et al, 2002	Escitalopram	10	Placebo	8	191	189	Not mentioned	Not mentioned	None	None
29060/ 810 (A), 2005	Unpublished results of Trivedi et al, 2004	Paroxetine	12.5	Placebo	8	156	75	23.2	23.8	None	None
29060/ 810 (B), 2005	Unpublished results of Trivedi et al, 2004	Paroxetine	25	Placebo	8	154	74	23.5	23.8	None	None
CIT-MD 03, 2005	Unpublished results of Roose et al, 2004	Citalopram	10 -40	Placebo	8	87	91	Not mentioned	Not mentioned	None	Elderly
Mendels et al, 1999	Primary publication	Citalopram	20-80	Placebo	4	89	91	23.9	24.1	None	None
Nyth et al, 1992	Primary publication	Citalopram	10-20	Placebo	6	91	51	22.1	21.1	None	Elderly
315, 1991	Unpublished lead trial	Sertraline	50-200	Placebo	8	85	80	Not mentioned	Not mentioned	None	None
Note: The alphabets in capital letters after author's name indicate different subtrials of a lead trial and in small letters after year of publication indicates different publications in the same year.
